# Supplementary material
Source: PubMed Central journal article supplement (PMC3616640)
Supplement: NIHMS145244-supplement-01.pdf [file NIHMS145244-supplement-01.pdf]

Cell, Volume 138

## **Supplemental Data**

### **Isodicentric Y Chromosomes and Sex**

### **Disorders as Byproducts of Homologous**

### **Recombination that Maintains Palindromes**

**Julian Lange, Helen Skaletsky, Saskia K.M. van Daalen, Stephanie L. Embry, Cindy M. Korver, Laura G. Brown, Robert D. Oates, Sherman Silber, Sjoerd Repping, and David C. Page**

## Table of Contents

### Supplemental Experimental Procedures

#### Supplemental Figures

**Figure S1.** Triangular dot plot of the MSY reference sequence shows intrachromosomal sequence similarities

**Figure S2.** STS content of structurally anomalous Y chromosomes in 85 individuals with deletion breakpoints in the long arm (Yq) or centromere

**Figure S3.** Comprehensive results of testing for duplication, in idicYp chromosomes, of sequences immediately proximal to targeted palindromes

**Figure S4.** Comprehensive results of testing the copy number, in idicYp chromosomes with breakpoints in palindrome P1, of sequences located between P1 and P5

**Figure S5.** Comprehensive results of testing for duplication, in isoYp or idicYp chromosomes, of sequences immediately proximal to targeted heterochromatic repeats

**Figure S6.** STS content of structurally anomalous Y chromosomes in two individuals with deletion breakpoints in the short arm (Yp)

**Figure S7.** Comprehensive results of testing for duplication, in an idicYq, of sequences immediately proximal to Yp inverted repeat IR3

**Figure S8.** Results of testing centromere function in structurally dicentric (idicYp) chromosomes

**Figure S9.** Molecular signatures of 23 idicY and isoY chromosomes predicted to form by ectopic homologous recombination events involving MSY palindromes, inverted repeats, and highly repetitive heterochromatic regions

#### Supplemental Tables

**Table S1.** Deletion breakpoint intervals of 85 individuals with breakpoints in the long arm (Yq) or centromere, and of two individuals with breakpoints in the short arm (Yp) of the MSY

**Table S2.** Characteristics of observed and predicted idicY and isoY chromosomes

**Table S3.** Y chromosome gene content and copy number of 23 idicY and isoY chromosomes predicted to form by ectopic homologous recombination events involving MSY palindromes, inverted repeats, and highly repetitive heterochromatic regions

**Table S4.** STSs used in the analysis of Y chromosome content

**Table S5.** Metaphase and interphase FISH assays of Y chromosome structure in individuals with breakpoints in the MSY

#### Supplemental References

## Supplemental Experimental Procedures

### Fluorescence In Situ Hybridization (FISH) Analysis of *IdicY* and *IsoY* Structure

To obtain metaphase spreads for FISH, actively proliferating lymphoblastoid cells were incubated for 15 min with 200 ng/ml colcemid (KaryoMAX, Invitrogen), harvested by centrifugation, resuspended for 10 min in 75 mM KCl at 37°C, and fixed in 3:1 methanol/acetic acid. To obtain interphase spreads, cells were first starved for four days prior to incubation in 75 mM KCl and fixation, without undergoing colcemid treatment. Preparations were dropped onto slides, treated for 60 min with 100 µg/ul RNase A in 2X SSC solution at 37°C and for 10 min with 0.01% pepsin in 10 mM hydrochloric acid at 37°C, fixed for 10 min with 10% formaldehyde, dehydrated by successive two-minute incubations in 70%, 96%, and 100% ethanol, and air-dried.

FISH probes were labeled by nick translation with biotin-dUTP (Roche), digoxigenin-dUTP (Roche), Cy3-dUTP (Amersham), or FITC-dUTP (Amersham). For hybridizations to single- or low-copy-number euchromatic sites, purified probes were resuspended in 50% formamide, 2X SSC, 50 mM sodium phosphate buffer, 10% dextran sulfate, pH7.0. Slides were denatured for 5 min in 60% formamide, 2X SSC, 50 mM sodium phosphate buffer, pH7.0 at 80°C, dehydrated by successive incubations in 70%, 96%, and 100% ethanol, and air-dried. Labeled probe (70-400 ng) was denatured for 5 min at 80°C, pre-hybridized with human COT DNA (Roche) for 30 min at 37°C, and hybridized overnight to slides under sealed coverslips at 37°C in a humid chamber. For hybridizations to high-copy-number heterochromatic repeats, purified probes were resuspended in 60% formamide, 2X SSC, 50 mM sodium phosphate buffer, pH7.0. Under sealed coverslips, 16-400 ng labeled probe and slides were denatured together for 5 min at 80°C, then hybridized overnight at 37°C in a humid chamber.

Slides were then subjected to three washes of 5 min each in 50% formamide, 2X SSC at 42°C, two washes of 5 min each in 2X SSC at 42°C, and a final wash of 5 min in TNT solution (TN buffer [100 mM Tris-HCl, pH7.5, 150 mM NaCl] plus 0.05% Tween 20) at room temperature. For hybridizations of biotin-labeled or digoxigenin-labeled probes (including all co-hybridizations), preparations were blocked by incubating them for 10 min with TNB (TN buffer plus 0.5% blocking reagent [Roche] and 0.02% thimerosal) at room temperature. Biotin-labeled probes were detected by incubation with Cy3-conjugated avidin (Jackson ImmunoResearch) diluted 1:5000 in TNB. Digoxigenin-labeled probes were detected by incubation with mouse anti-digoxigenin antibody (Sigma) diluted 1:100 in TNB followed by incubation with FITC-labeled rabbit anti-mouse IgG antibody (Sigma) diluted 1:500 in TNB. These incubations were performed in a humid chamber at 37°C for 20 min. Slides were then washed in TNT for 5 min at room temperature. (Exceptionally, preparations hybridized with biotin-labeled probe 18E8 underwent blocking with NFDM solution [4X SSC plus 5% non-fat dry milk and 0.02% thimerosal] for 10 min at room temperature, biotin detection with FITC-conjugated avidin diluted 1:125 in NFDM for 20 min at room temperature, and washing with 4X SSC plus 0.05% Tween 20 for 5 min at room temperature.) Slides were dehydrated by successive two-minute incubations in 70%, 96%, and 100% ethanol, and air-dried. Chromosomes were counterstained with DAPI or propidium iodide in mounting medium (Vector Laboratories).

Slides were viewed through a Zeiss Axioskop fluorescence microscope equipped with a CCD camera (ER-3339, Applied Imaging). Images were captured with Applied Imaging Cytovision software and processed with Adobe Photoshop. In each interphase experiment that involved the counting of sites of hybridization, at least 100 nuclei were scored. See Table S5 for specific information on individual FISH probes and assays.

### **Immunofluorescence (IF) – FISH Counting of Active Centromeres**

To obtain metaphase spreads for IF-FISH, actively proliferating lymphoblastoid cells were incubated with 25 ng/ml colcemid for 75 min, harvested by centrifugation, resuspended at a concentration of  $1 \times 10^5$  cells/ml in hypotonic solution (0.4% sodium citrate, 25 mM KCl, prewarmed to 37°C) for 15 min, and centrifuged onto glass slides for 10 min at 2000 rpm with high acceleration (Shandon Cytospin 4, Thermo Scientific). Spreads were fixed for 10 min at room temperature in 4% formaldehyde in PBS plus 0.1% Triton X-100, and then rinsed with PBS.

For IF, preparations were first blocked by incubating with 3% BSA in PBS-0.1% Tween 20 for 1 hr at room temperature. Anti-CENP-E antibody (Harrington et al., 1997) was diluted to 1:200 in PBS-0.1% Tween 20 plus 1% BSA, added to slides, and covered with glass coverslips. Slides were incubated for 60 min at room temperature, and then washed three times for 5 min each with PBS-0.1% Triton X-100 at room temperature. Primary antibody was detected by incubating slides for 30 min at room temperature with Cy3-conjugated donkey anti-rabbit IgG antibody (Jackson ImmunoResearch) diluted 1:200 in PBS-0.1% Tween 20 plus 1% BSA. All incubations were performed in a humid chamber. Preparations were then washed three times for 5 min each in PBS-0.05% Tween 20 at room temperature, fixed for 10 min in 10% formalin solution (Sigma) at room temperature, washed once for 5 min in PBS-0.05% Tween 20 at room temperature, and either processed immediately or stored overnight in PBS-0.05% Tween 20 at 4°C.

For FISH, probe pDP97 was labeled by nick translation with SpectrumGreen dUTP (Abbott Molecular), purified, and resuspended at a concentration of 20 ng/ $\mu$ l in hybridization mix (65% formamide, 2X SSC, 10% dextran sulfate, 100  $\mu$ g/ml salmon sperm DNA). Chromosomal DNA was denatured in 70% formamide, 2X SSC, pH7.0 at 75°C for 12 min, and then rinsed in 2X SSC at RT for 5 min. Labeled probe (200 ng) was denatured at 72°C for 7 min and hybridized to chromosomes under sealed coverslips at 37°C overnight in a humid chamber. Slides were washed twice for 8 min each in 50% formamide, 2X SSC, pH7.0 at 42°C and once for 8 min in 2X SSC at 37°C. Chromosomes were counterstained with DAPI in mounting medium (Vector Laboratories).

Slides were examined under a Zeiss Axiovert 200M microscope fitted with a Hamamatsu ORCA-ER camera. Images were captured with OpenLab software (Improvision) and processed with Adobe Photoshop. For each cell line, at least 20 idicYp-chromosome-bearing spreads of good morphology were scored.

**Figure S1. Triangular dot plot of the MSY reference sequence shows intrachromosomal sequence similarities**

Triangular intra-arm dot plot of the MSY reference sequence (adapted from Skaletsky et al., 2003). In this plot, each dot represents a match of >98% within a window of 1000 bp. Repeat elements have been masked. Euchromatic repeats are shown in black, heterochromatic repeat arrays in red. Inverted repeats such as palindromes appear as vertical lines, direct repeats as horizontal lines.

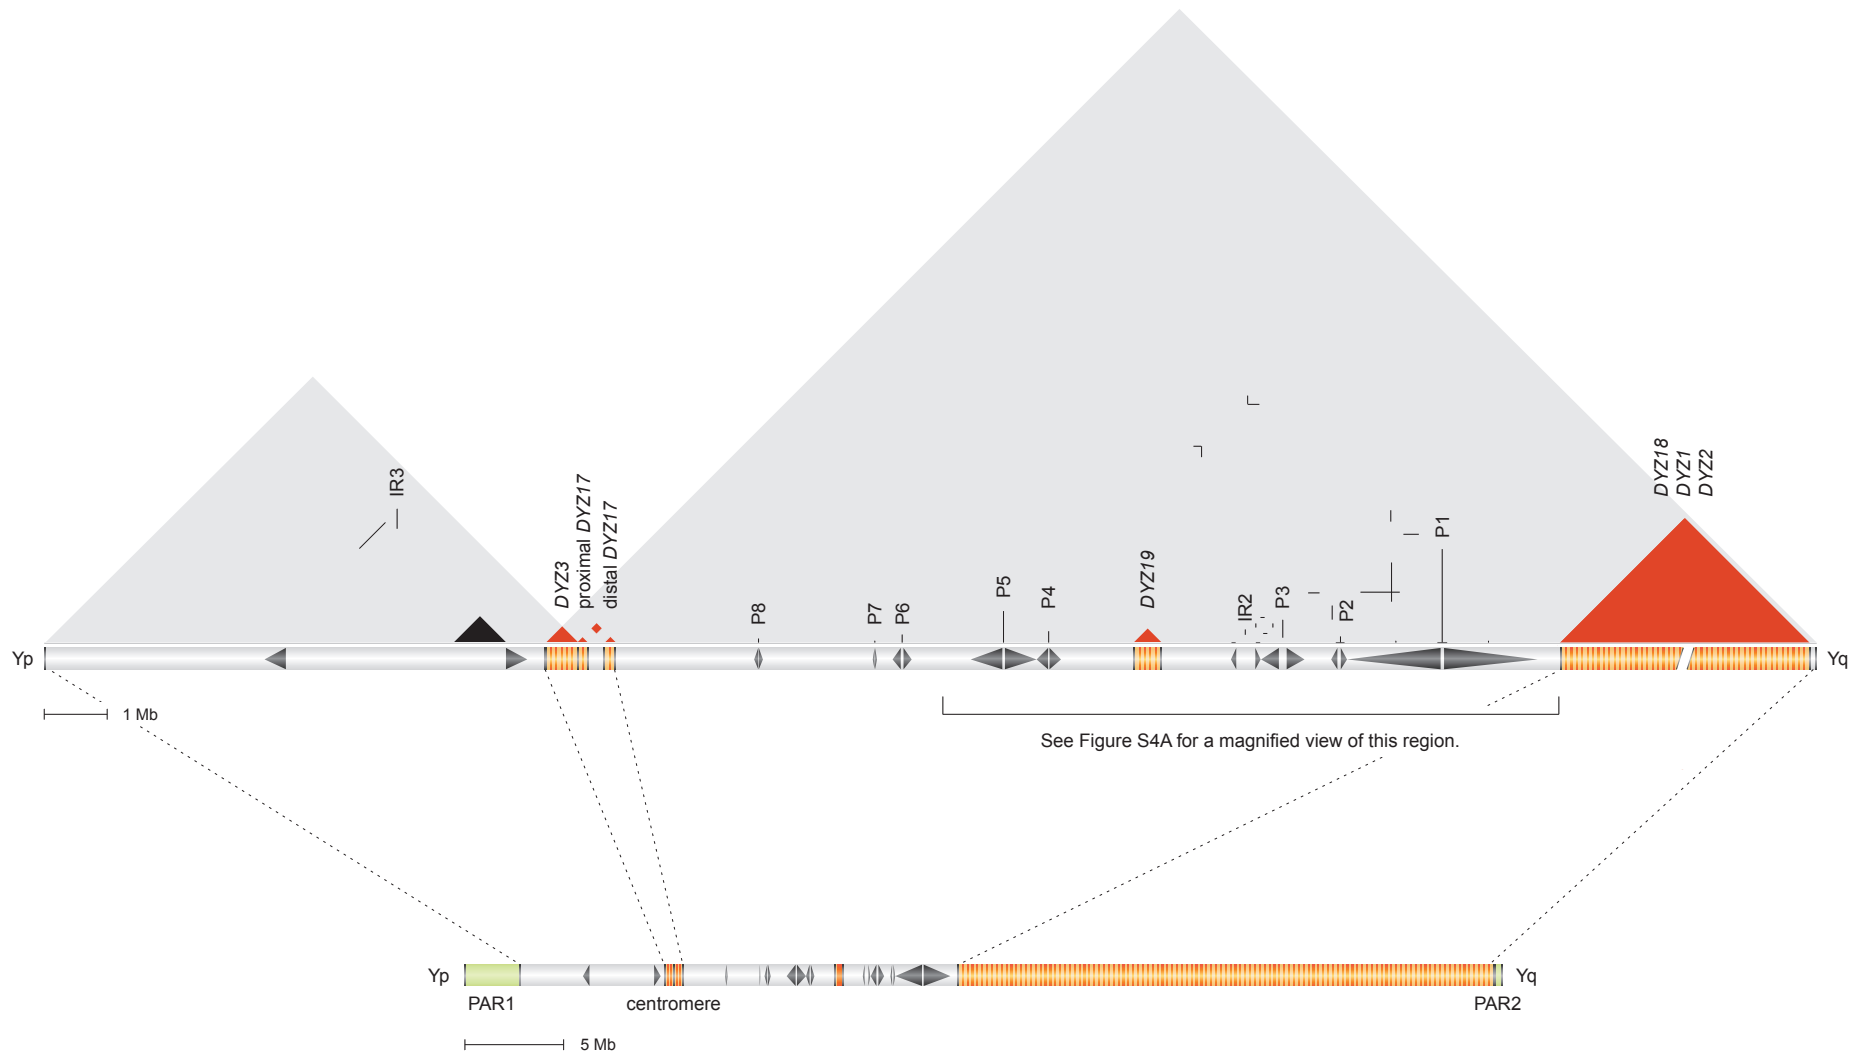



**Figure S3. Comprehensive results of testing for duplication, in idicYp chromosomes, of sequences immediately proximal to targeted palindromes**

(A-F) For palindromes P8 (A), P6 (B), P5 (C), P4 (D), IR2 (E), and P3 (F) that, based on STS mapping, were hypothesized to have been targeted by ectopic homologous recombination in the formation of idicYp chromosomes, we designed specific FISH assays to determine, in individuals with idicYp chromosomes, the copy number of sequences located immediately proximal to targeted palindromes.

In each series of figures, we show: (i) schematics of a reference chromosome and of an idicYp formed by the proposed mechanism at each palindrome, and the locations of probes hybridized to interphase spreads; (ii) counting results tabulated for a control male and for each case tested with the probe indicated; (iii) counting results summarized graphically for a control male and for each case tested with the probe indicated; and (iv) representative FISH images for a control male and for an individual with an idicYp to demonstrate common FISH patterns.

See Figure S4 for idicYp chromosomes formed at inverted repeats in P1. All FISH micrographs are displayed at the same magnification.

**A P8**

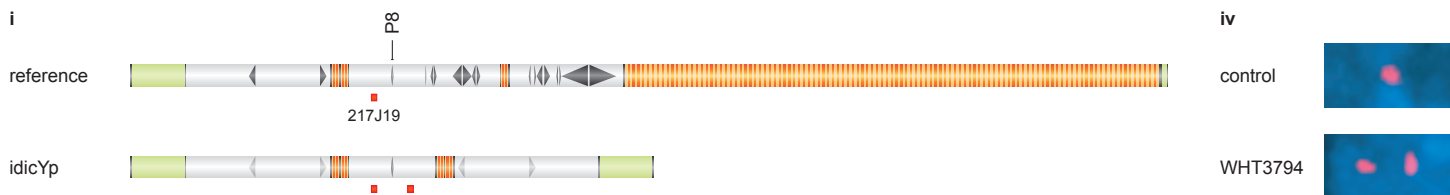

ii 217J19

|         | Number of nuclei with signal count of |     |    |   |    | Inferred number of sites of hybridization |
|---------|---------------------------------------|-----|----|---|----|-------------------------------------------|
|         | 1                                     | 2   | 3  | 4 | >4 |                                           |
| control | 179                                   | 21  | 0  | 0 | 0  | 1                                         |
| WHT3062 | 63                                    | 124 | 8  | 5 | 0  | 2                                         |
| WHT3794 | 60                                    | 125 | 11 | 4 | 0  | 2                                         |
| WHT3954 | 78                                    | 118 | 2  | 2 | 0  | 2                                         |

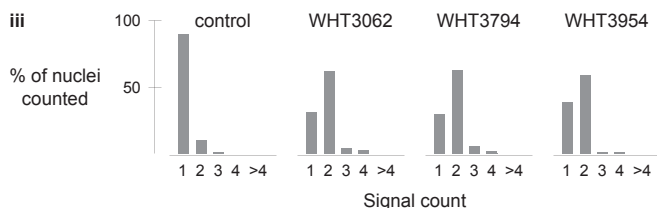

**B P6**

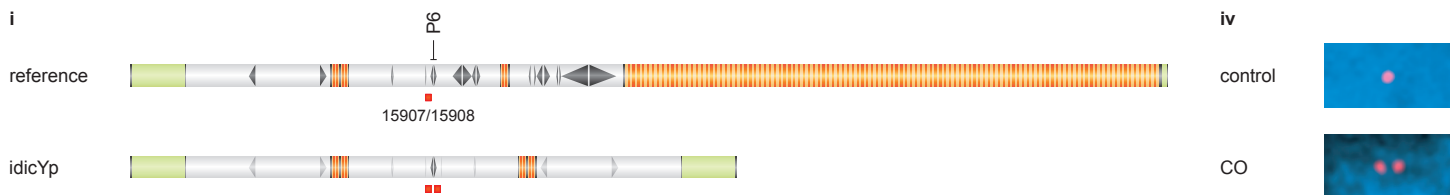

ii 15907/15908

|         | Number of nuclei with signal count of |    |   |   |    | Inferred number of sites of hybridization |
|---------|---------------------------------------|----|---|---|----|-------------------------------------------|
|         | 1                                     | 2  | 3 | 4 | >4 |                                           |
| control | 117                                   | 32 | 1 | 0 | 0  | 1                                         |
| CO      | 69                                    | 50 | 1 | 0 | 0  | 2                                         |

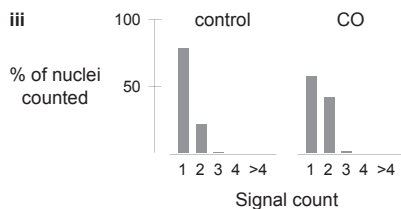

**Figure S3 continued. Comprehensive results of testing for duplication, in idicYp chromosomes, of sequences immediately proximal to targeted palindromes**

**C P5**

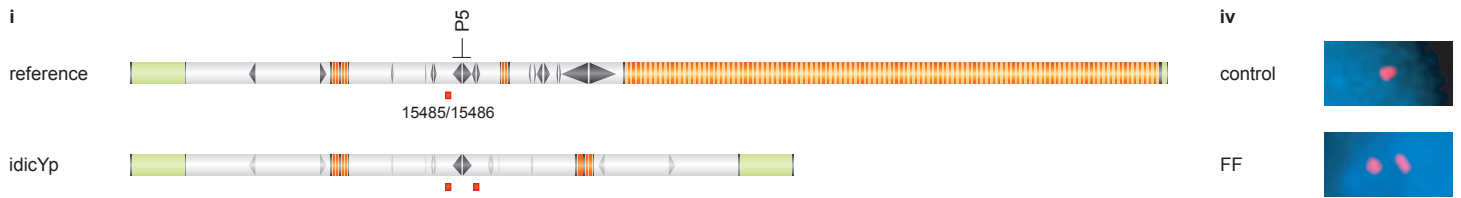

**ii 15485/15486**

|         | Number of nuclei with signal count of |     |   |   |    | Inferred number of sites of hybridization |
|---------|---------------------------------------|-----|---|---|----|-------------------------------------------|
|         | 1                                     | 2   | 3 | 4 | >4 |                                           |
| control | 187                                   | 12  | 1 | 0 | 0  | 1                                         |
| FF      | 78                                    | 119 | 3 | 0 | 0  | 2                                         |
| RS      | 81                                    | 115 | 4 | 0 | 0  | 2                                         |
| WHT2024 | 102                                   | 94  | 4 | 0 | 0  | 2                                         |
| WHT2171 | 79                                    | 116 | 5 | 0 | 0  | 2                                         |
| WHT3717 | 100                                   | 99  | 1 | 0 | 0  | 2                                         |
| WHT4064 | 81                                    | 113 | 4 | 2 | 0  | 2                                         |

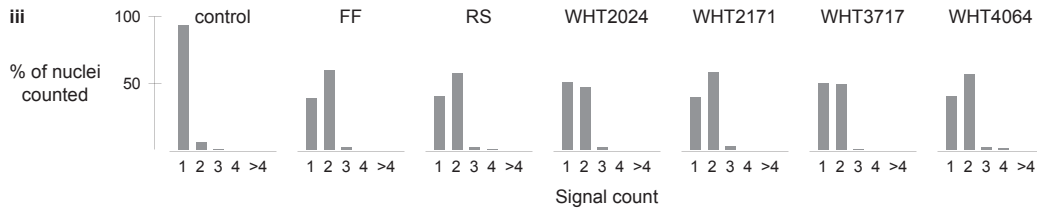

**D P4**

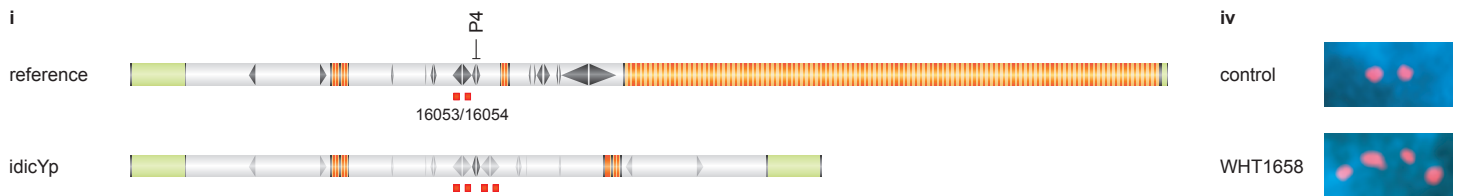

**ii 16053/16054**

|         | Number of nuclei with signal count of |    |    |    |    | Inferred number of sites of hybridization |
|---------|---------------------------------------|----|----|----|----|-------------------------------------------|
|         | 1                                     | 2  | 3  | 4  | >4 |                                           |
| control | 103                                   | 97 | 0  | 0  | 0  | 2                                         |
| WHT1658 | 14                                    | 60 | 72 | 54 | 0  | 4                                         |

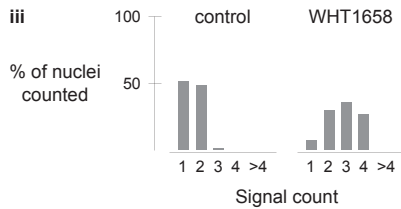



**Figure S3 continued. Comprehensive results of testing for duplication, in idicYp chromosomes, of sequences immediately proximal to targeted palindromes**

**E IR2**

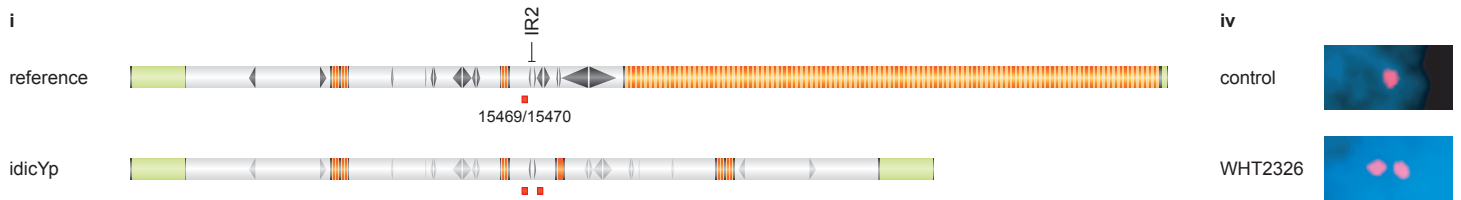

ii 15469/15470

|         | Number of nuclei with signal count of |     |   |   |    | Inferred number of sites of hybridization |
|---------|---------------------------------------|-----|---|---|----|-------------------------------------------|
|         | 1                                     | 2   | 3 | 4 | >4 |                                           |
| control | 185                                   | 15  | 0 | 0 | 0  | 1                                         |
| DM      | 88                                    | 102 | 8 | 2 | 0  | 2                                         |
| JC      | 70                                    | 122 | 6 | 2 | 0  | 2                                         |
| WHT2326 | 101                                   | 96  | 3 | 0 | 0  | 2                                         |

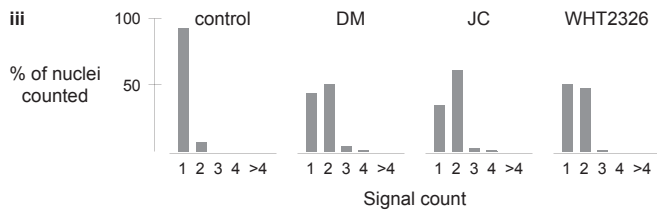

**F P3**

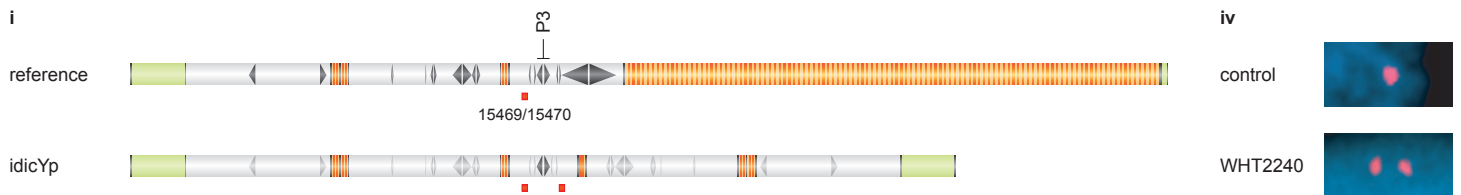

ii 15469/15470

|         | Number of nuclei with signal count of |     |    |   |    | Inferred number of sites of hybridization |
|---------|---------------------------------------|-----|----|---|----|-------------------------------------------|
|         | 1                                     | 2   | 3  | 4 | >4 |                                           |
| control | 185                                   | 15  | 0  | 0 | 0  | 1                                         |
| WHT1434 | 68                                    | 120 | 8  | 4 | 0  | 2                                         |
| WHT2064 | 55                                    | 129 | 13 | 3 | 0  | 2                                         |
| WHT2240 | 55                                    | 137 | 6  | 2 | 0  | 2                                         |

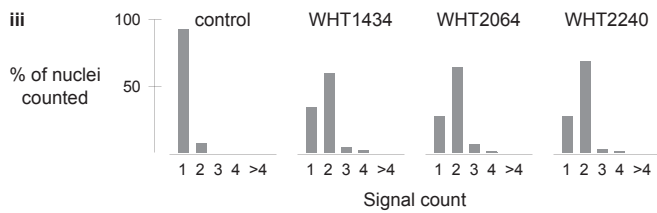

**Figure S4. Comprehensive results of testing the copy number, in idicYp chromosomes with breakpoints in palindrome P1, of sequences located between P1 and P5**

Large blocks of palindrome P1 are repeated in palindromes P2, P3, and P5. Like opposing arms of palindromes, these inverted repeats could serve as targets for the proposed model. In each case displaying an idicYp with a breakpoint in P1, the inverted repeats that were targeted in the formation of the idicYp can be determined by STS mapping and specific FISH assays.

(A) Triangular dot plot of the region of the MSY long arm spanned by palindromes P5 and P1, which features many amplicons in both inverted and direct orientation (plot adapted from Skaletsky et al., 2003). Color segmentation of the palindromes highlights the complex ampliconic structure of this region. In this plot, each dot represents a match of >98% within a window of 1000bp. Repeat elements have been masked. Euchromatic repeats are shown in black, heterochromatic repeat arrays in red. Inverted repeats including palindromes appear as vertical lines, direct repeats as horizontal lines.

(B) Ampliconic structure of the region spanned by P5 and P1 in the reference MSY and in idicYp chromosomes predicted to form by eight distinct ectopic homologous recombination events between inverted repeats in this region. Shown are (i) the reference sequence spanning P5 and P1, and the target sequences on sister chromatids and ampliconic structures of idicYp chromosomes predicted to form at the following inverted repeats: (ii) b3/b2 - proximal P1/P3; (iii) IR5 - proximal P1/P5; (iv) P1.2; (v) rg/gr - P1/P2; (vi) P1; (vii) P1.1; (viii) IR5 - distal P1/P5; and (ix) b4/b1 - distal P1/P3. Predicted idicYp chromosomes can be distinguished by the results of three STSs tested on genomic DNA - sY1291, sY1206, and sY1201 - and three FISH probes hybridized to interphase spreads - 1325K3, 18E8, and 100J21.

(C) Summary of predicted STS mapping and FISH results for each proposed idicYp shown in (B).

(D-F) Six individuals with idicYp chromosomes that, by mapping of STSs including sY1291, sY1206, and sY1201, displayed breakpoints in P1, were tested with three FISH probes to determine which inverted repeat had been targeted in each case. For each of three FISH probes 1325K3 (D), 18E8 (E), and 100J21 (F), we show: (i) counting results tabulated for a control male and for each of six cases tested; (ii) counting results summarized graphically for each case; and (iii) representative FISH images for a control and two individuals with idicYp chromosomes to demonstrate common FISH patterns. All FISH micrographs are displayed at the same magnification. For clarity, images in (E) and (F) were pseudocolored with Adobe Photoshop to match, for each probe, signal color with the color of the amplicon to which the probe hybridized. Images for controls and test cases were treated identically.

(G) Summary of observed STS mapping and FISH results in (D-F). By comparing observed results with predicted results in (C), we inferred which inverted repeat was targeted in the formation of each idicYp. Five of the six idicYp chromosomes had formed between opposing arms of P1, and one had formed between inverted repeats rg/gr in P1 and P2.

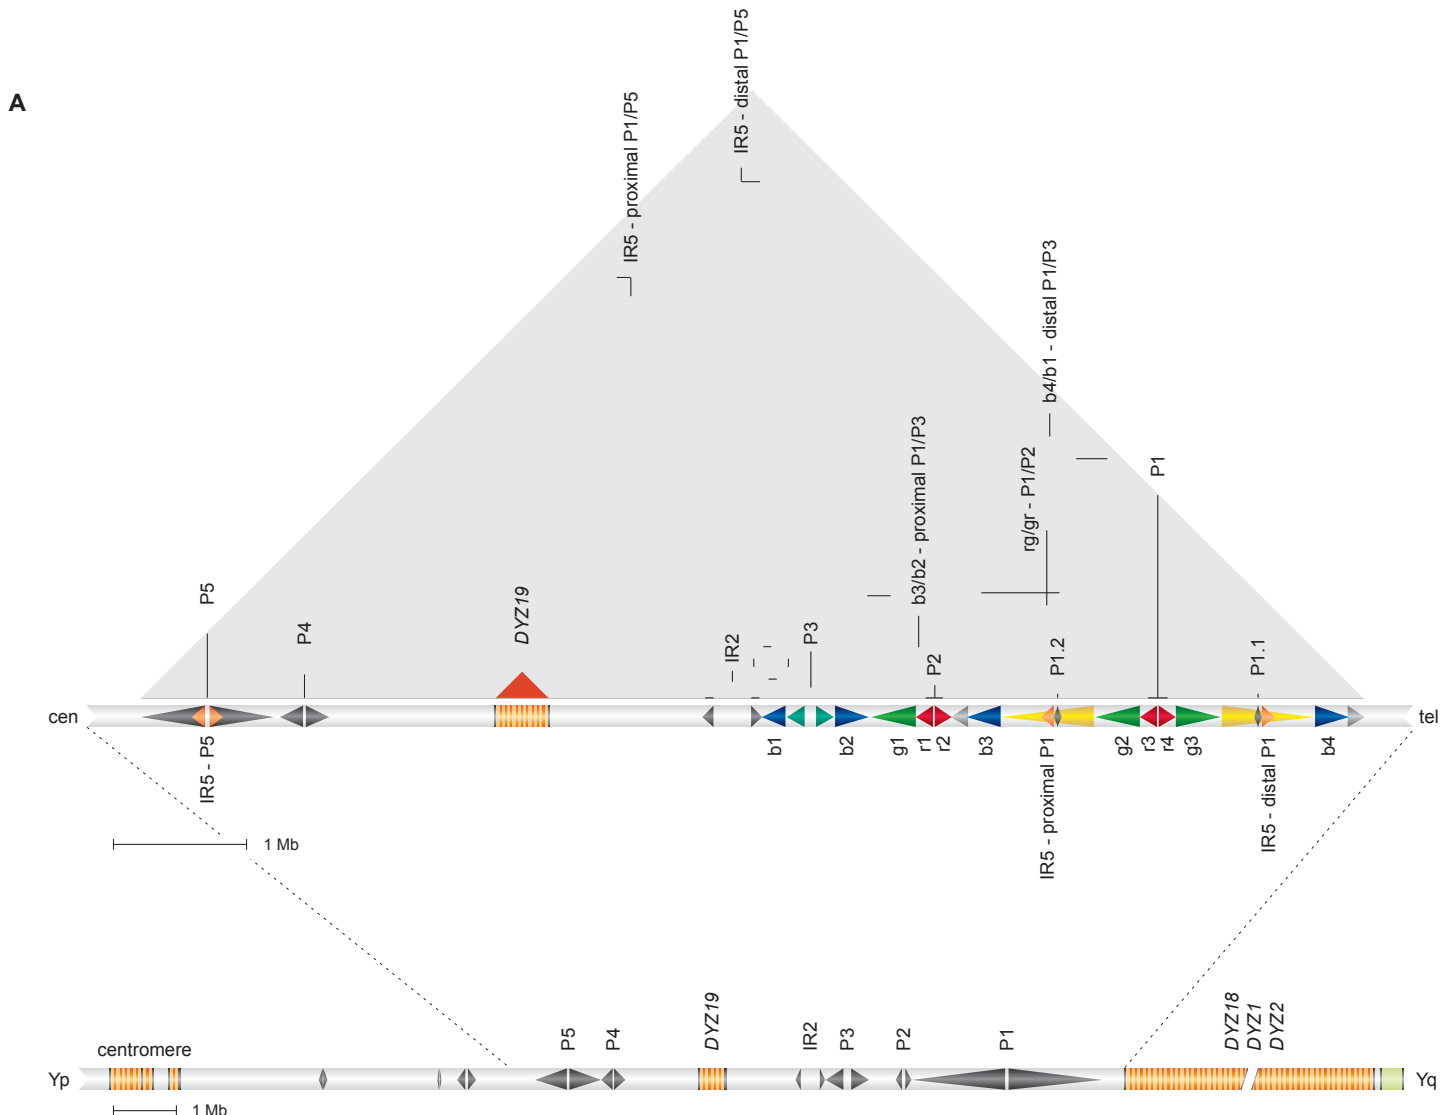

**Figure S4 continued. Comprehensive results of testing the copy number, in idicYp chromosomes with breakpoints in palindrome P1, of sequences located between P1 and P5**

**B**

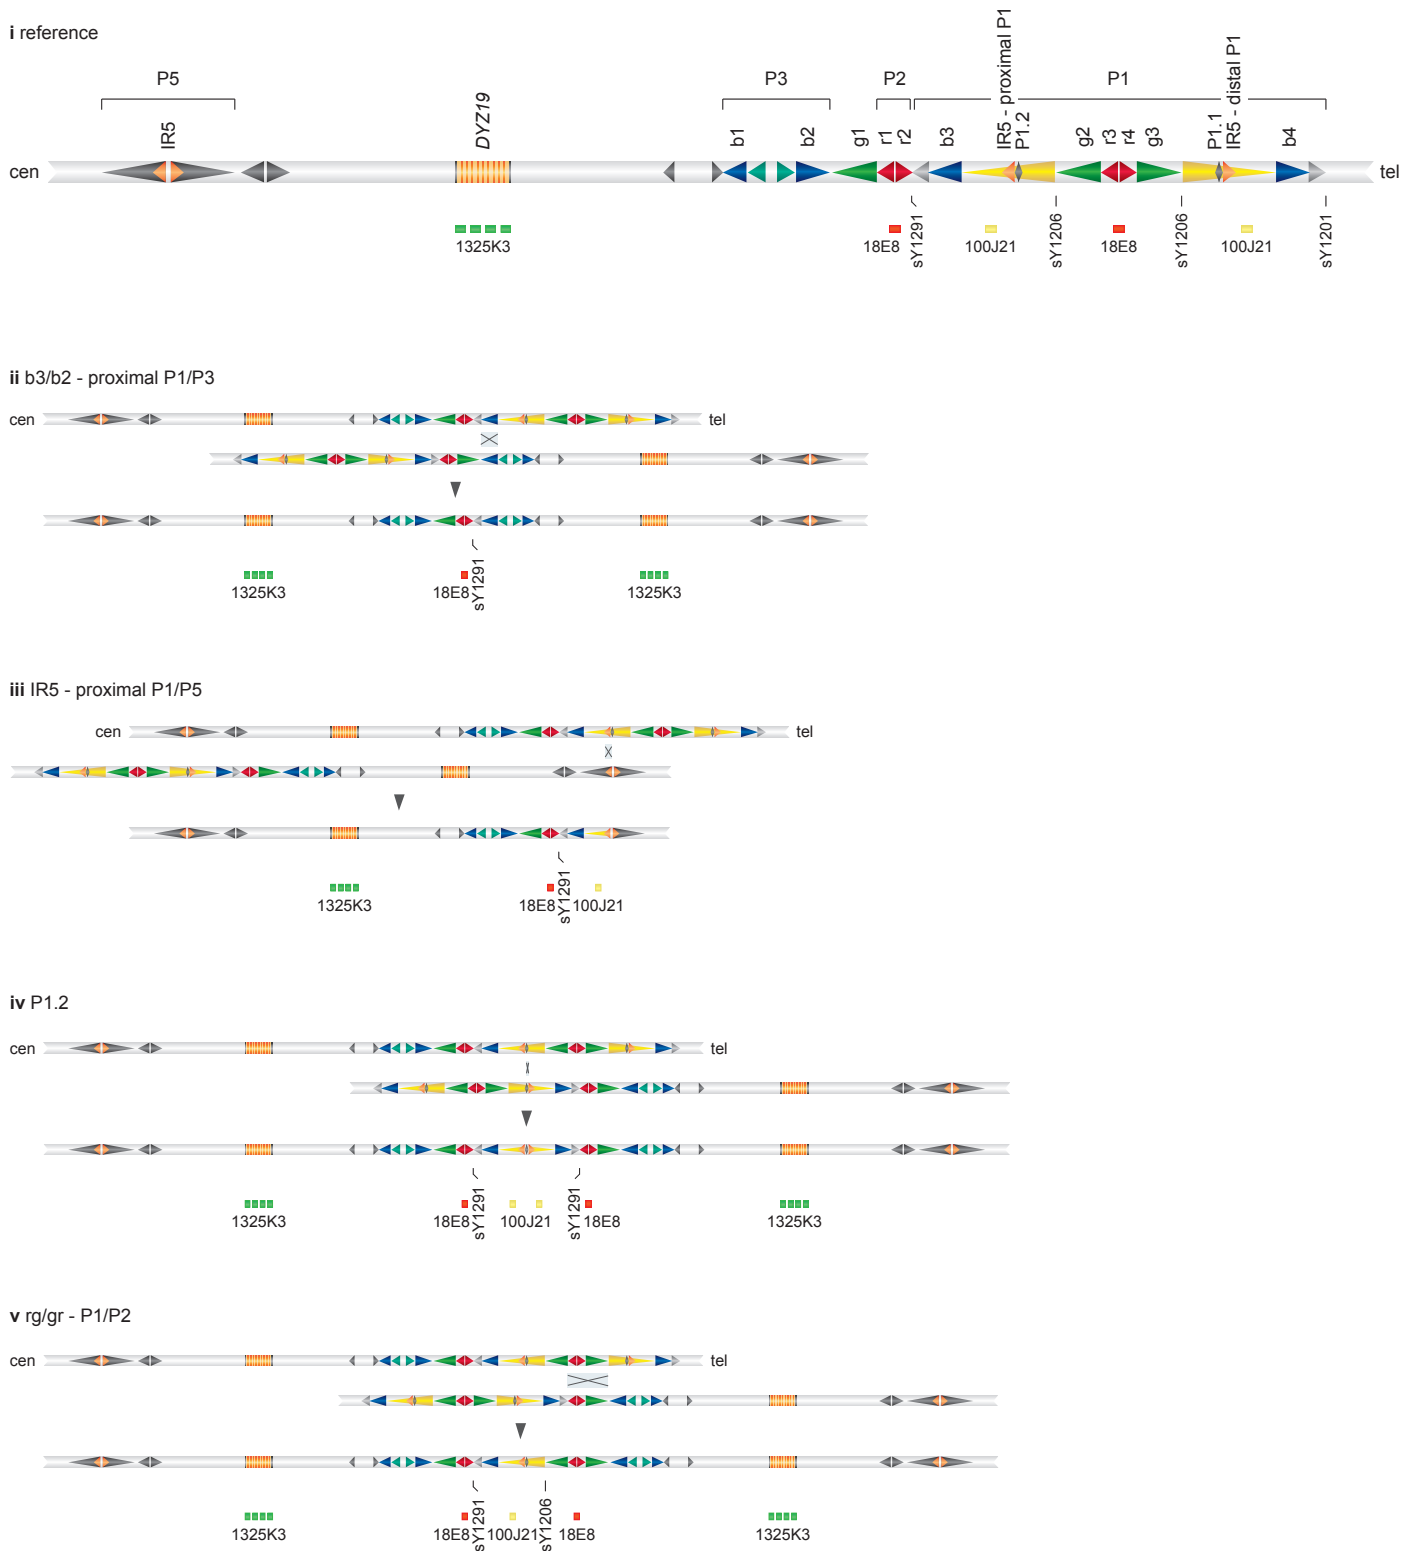

**Figure S4 continued. Comprehensive results of testing the copy number, in idicYp chromosomes with breakpoints in palindrome P1, of sequences located between P1 and P5**

**B continued**

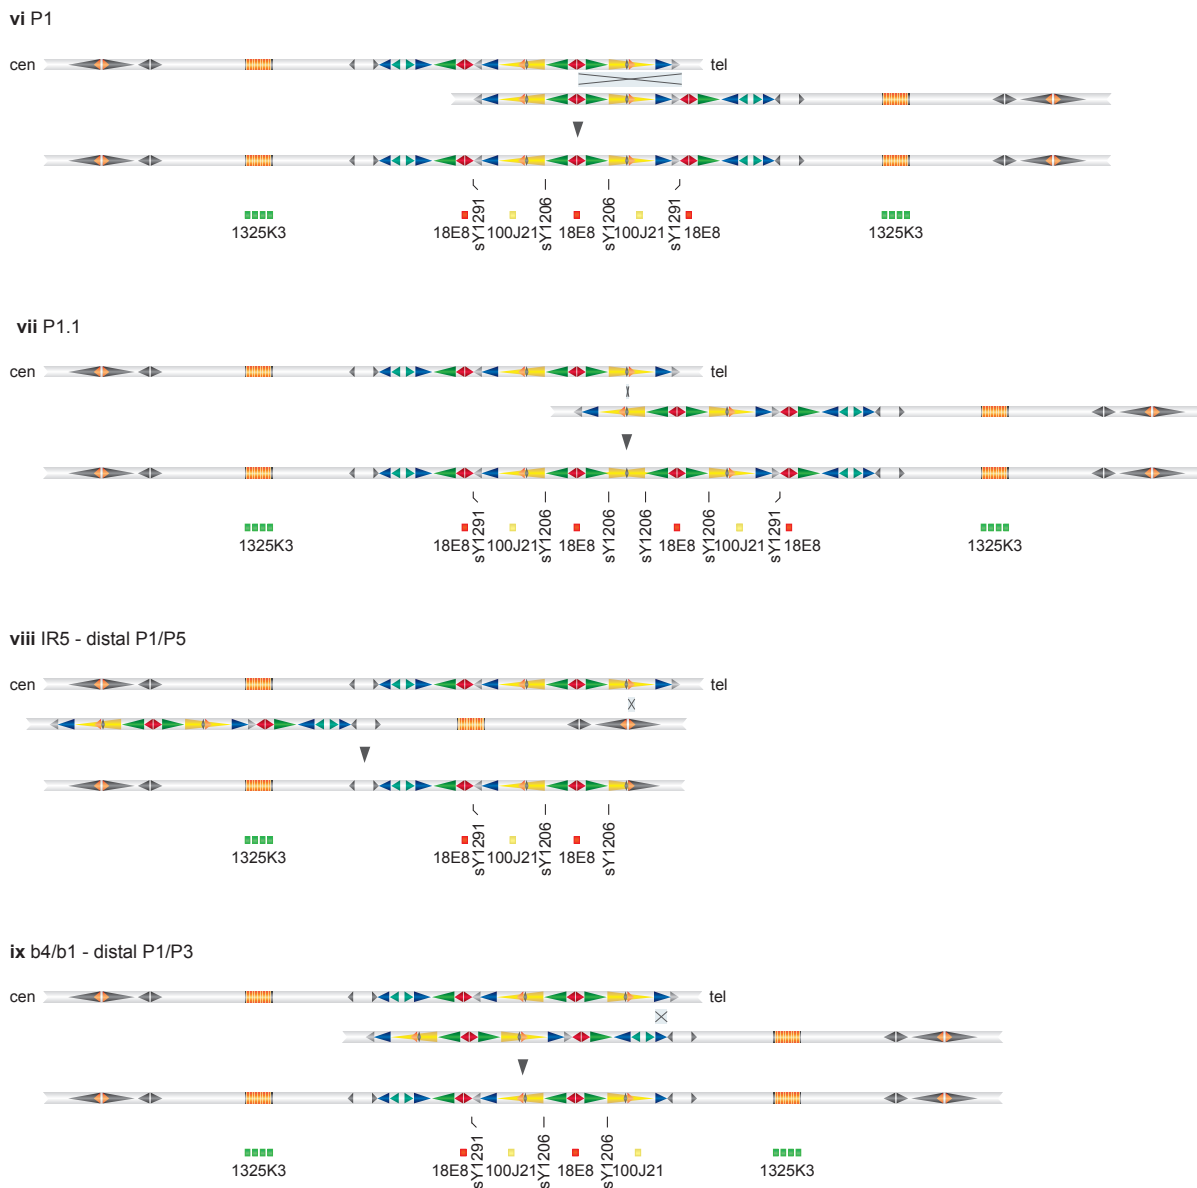

**C Summary of predicted STS mapping and FISH results**

|                        | Presence or absence of each STS |        |        | Number of copies present for each probe |      |        |
|------------------------|---------------------------------|--------|--------|-----------------------------------------|------|--------|
|                        | sY1291                          | sY1206 | sY1201 | 1325K3                                  | 18E8 | 100J21 |
| reference              | +                               | +      | +      | 1                                       | 2    | 2      |
| b3/b2 - proximal P1/P3 | +                               | -      | -      | 2                                       | 1    | 0      |
| IR5 - proximal P1/P5   | +                               | -      | -      | 1                                       | 1    | 1      |
| P1.2                   | +                               | -      | -      | 2                                       | 2    | 2      |
| rg/gr - P1/P2          | +                               | +      | -      | 2                                       | 2    | 1      |
| P1                     | +                               | +      | -      | 2                                       | 3    | 2      |
| P1.1                   | +                               | +      | -      | 2                                       | 4    | 2      |
| IR5 - distal P1/P5     | +                               | +      | -      | 1                                       | 2    | 1      |
| b4/b1 - distal P1/P3   | +                               | +      | -      | 2                                       | 2    | 2      |

**Figure S4 continued. Comprehensive results of testing the copy number, in idicYp chromosomes with breakpoints in palindrome P1, of sequences located between P1 and P5**

**D 1325K3**

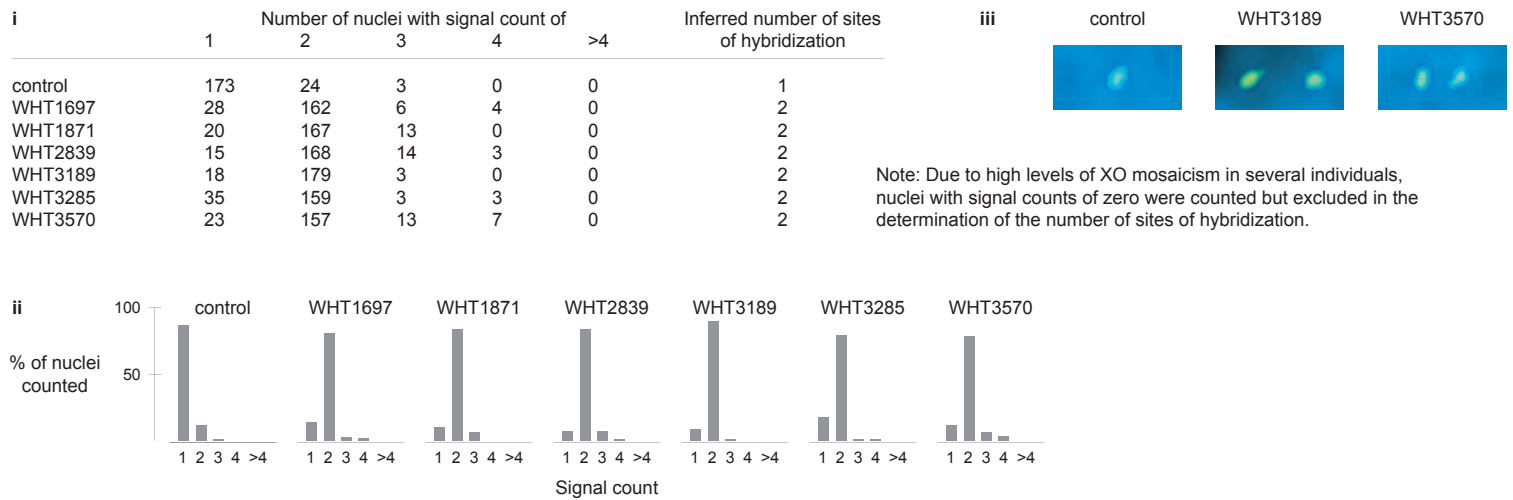

**E 18E8**

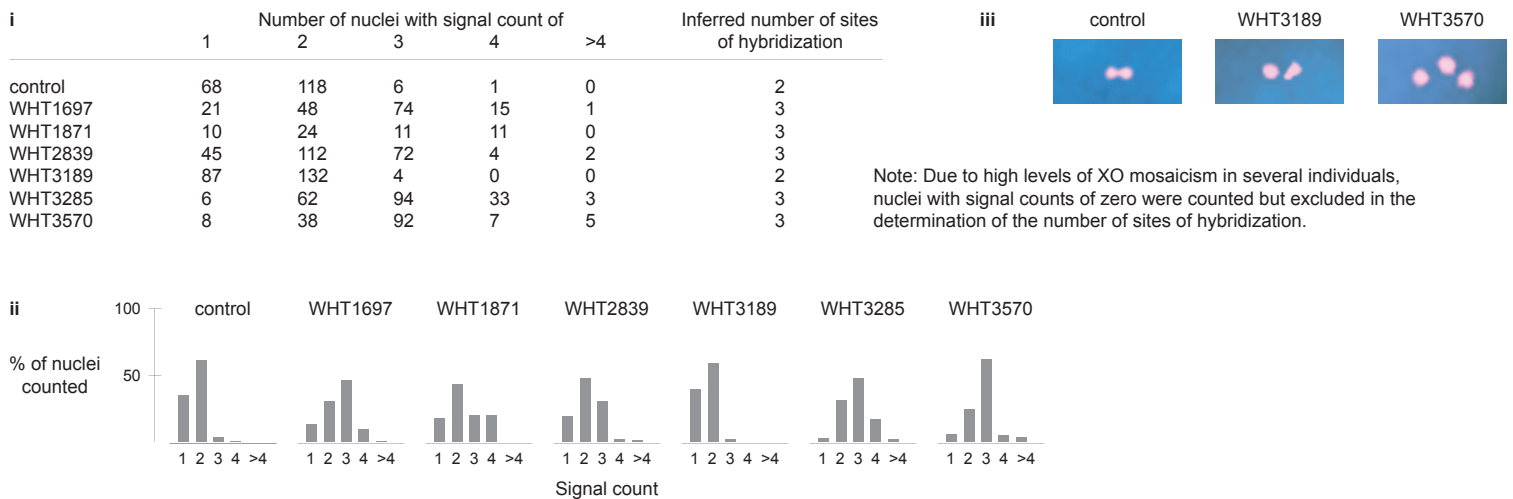

**F 100J21**

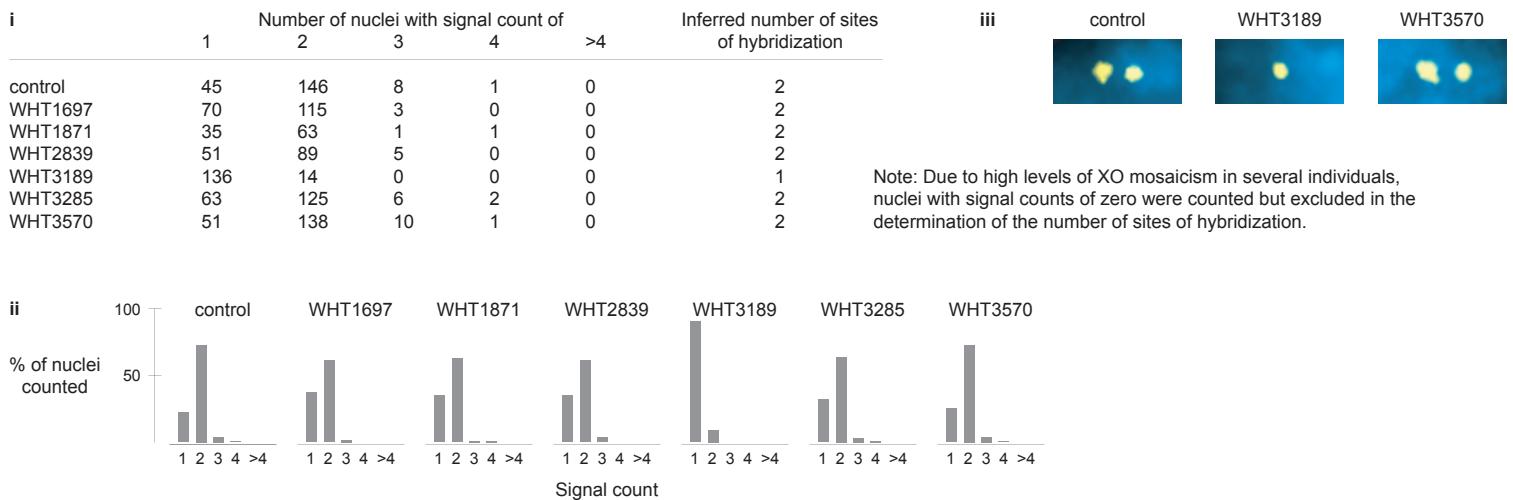

**Figure S4 continued. Comprehensive results of testing the copy number, in idicYp chromosomes with breakpoints in palindrome P1, of sequences located between P1 and P5**

**G** Summary of observed STS mapping and FISH results

|         | Presence or absence of each STS |        |        | Number of copies present for each probe |      |        | Inferred targeted repeat |
|---------|---------------------------------|--------|--------|-----------------------------------------|------|--------|--------------------------|
|         | sY1291                          | sY1206 | sY1201 | 1325K3                                  | 18E8 | 100J21 |                          |
| control | +                               | +      | +      | 1                                       | 2    | 2      | reference                |
| WHT1697 | +                               | +      | -      | 2                                       | 3    | 2      | P1                       |
| WHT1871 | +                               | +      | -      | 2                                       | 3    | 2      | P1                       |
| WHT2839 | +                               | +      | -      | 2                                       | 3    | 2      | P1                       |
| WHT3189 | +                               | +      | -      | 2                                       | 2    | 1      | rg/gr - P1/P2            |
| WHT3285 | +                               | +      | -      | 2                                       | 3    | 2      | P1                       |
| WHT3570 | +                               | +      | -      | 2                                       | 3    | 2      | P1                       |

**Figure S5. Comprehensive results of testing for duplication, in isoYp or idicYp chromosomes, of sequences immediately proximal to targeted heterochromatic repeats**

(A-C) For heterochromatic repeats *DYZ3* (A), proximal *DYZ17* (B), and *DYZ18/DYZ1/DYZ2* (C) that, based on STS mapping, were hypothesized to have been targeted by ectopic homologous recombination in the formation of isoYp or idicYp chromosomes, we designed specific FISH assays to determine, in individuals with isoYp or idicYp chromosomes, the copy number of sequences located immediately proximal to targeted heterochromatic repeats.

In the series of figures (A and B), we show: (i) schematics of a reference chromosome and of an isoYp formed by the proposed mechanism at each heterochromatic repeat, and the locations of probes hybridized to interphase spreads; (ii) counting results tabulated for a control male and for each case tested with the probe indicated; (iii) counting results summarized graphically for each case; and (iv) representative FISH images for a control male and for an individual with an isoYp to demonstrate common FISH patterns. All images are displayed at the same magnification.

In the series of figures (C), we show: (i) schematics of a reference chromosome and of an idicYp formed by the proposed mechanism at *DYZ18/DYZ1/DYZ2*, and the locations of two probes hybridized to metaphase spreads; (ii) conclusions on the number of signals for probe 1136L22 for a control male and for each tested case; and (iii) representative FISH images for a control male and for an individual with an idicYp to demonstrate common FISH patterns. Images are at the same magnification.

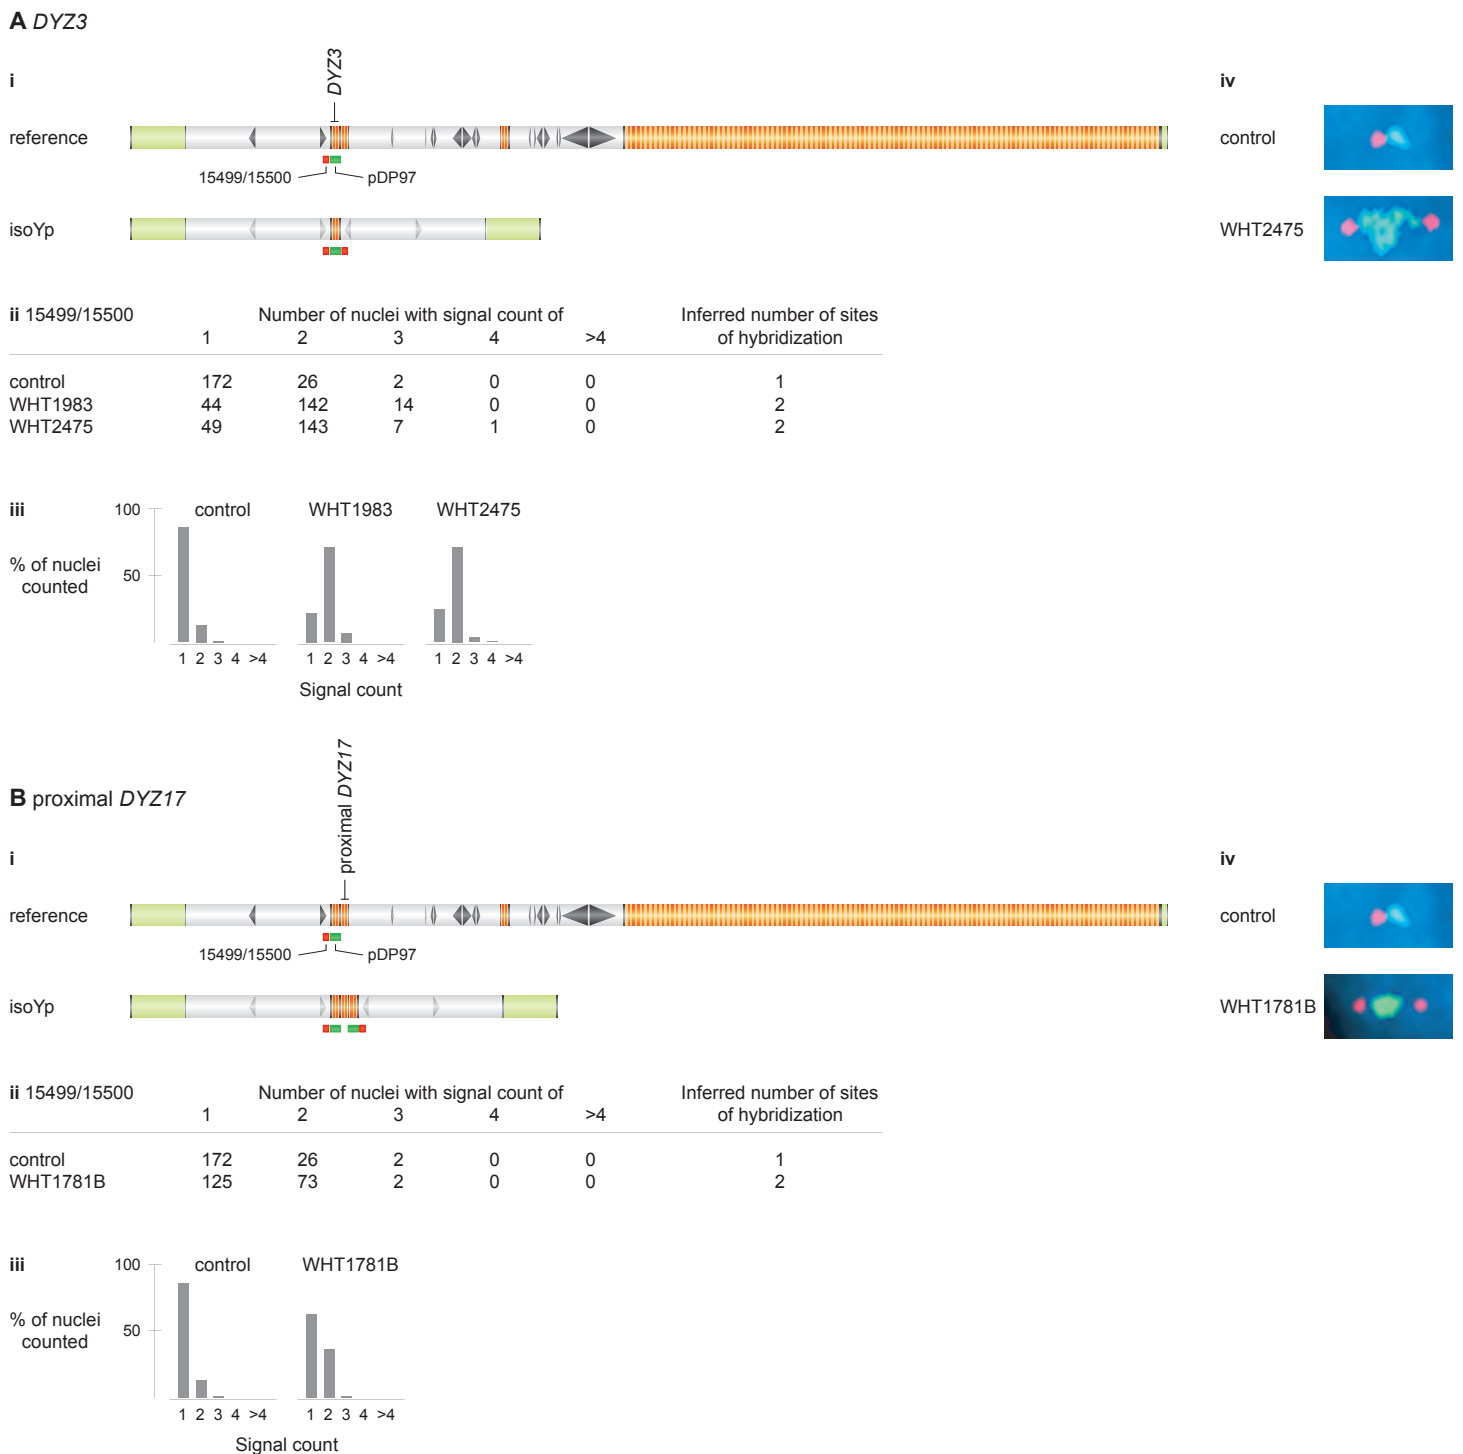

**Figure S5 continued. Comprehensive results of testing for duplication, in isoYp or idicYp chromosomes, of sequences immediately proximal to targeted heterochromatic repeats**

**C** *DYZ18/DYZ1/DYZ2*

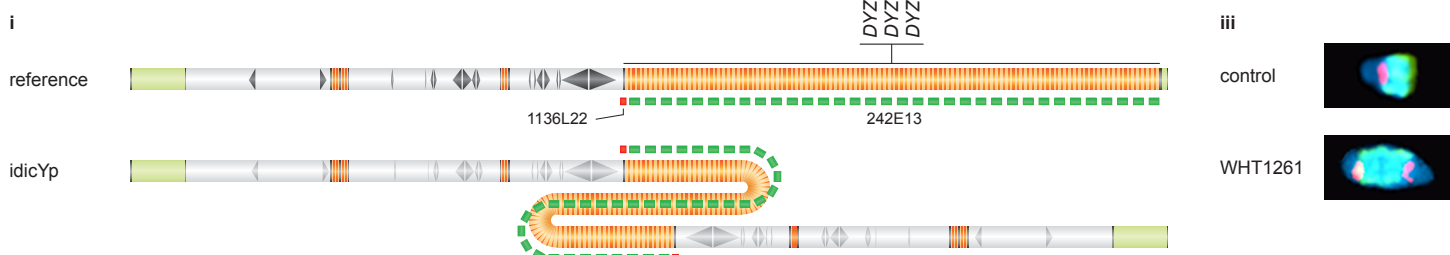

**ii** 1136L22

|         | Inferred number of sites of hybridization |
|---------|-------------------------------------------|
| control | 1                                         |
| WHT1261 | 2                                         |
| WHT3643 | 2                                         |



**Figure S6. STS content of structurally anomalous Y chromosomes in two individuals with deletion breakpoints in the short arm (Yp)**

(A) Schematic representation of Yp and centromeric region of Y chromosome, indicating locations of IR3 inverted repeat and male-determining gene *SRY*.

(B) STSs employed in fine mapping of deletion breakpoints in two individuals in whom sY14 was absent, and sY78 and sY1273 were present. These STSs include boundary and spacer-flanking markers for the IR3 inverted repeat, and a marker in Yp pericentromeric euchromatin.

(C) Results of testing genomic DNAs from two individuals for presence or absence of STSs. Solid black bars encompass STSs found to be present. Gray bars indicate breakpoint intervals within IR3's distal arm that could not be further narrowed due to cross-amplification of identical sequences in IR3's proximal arm.

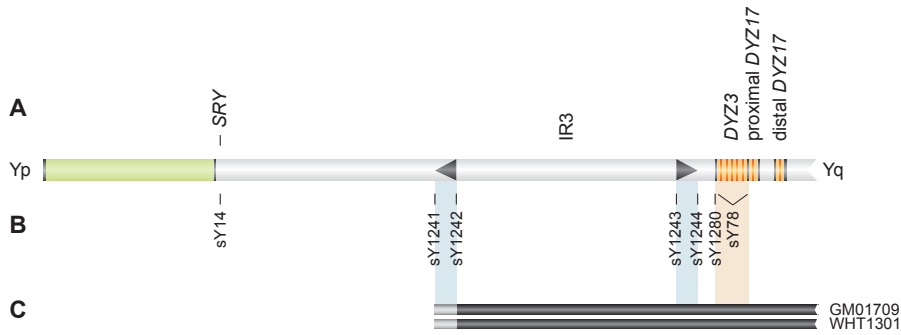

**Figure S7. Comprehensive results of testing for duplication, in an idicYq, of sequences immediately proximal to Yp inverted repeat IR3**

For inverted repeat IR3 that, based on STS mapping, was hypothesized to have been targeted by ectopic homologous recombination in the formation of idicYq chromosomes, we designed a specific FISH assay to determine, in an individual with an idicYq, the copy number of sequences located immediately proximal to IR3.

In the series of figures, we show: (i) schematics of a reference chromosome and of an idicYq formed by the proposed mechanism at IR3, and the locations of probes hybridized to interphase spreads; (ii) counting results tabulated for a control male and for the case tested with the probe indicated; (iii) counting results summarized graphically; and (iv) representative FISH images for a control male and for an individual with an idicYq to demonstrate common FISH patterns. Images are at the same magnification.

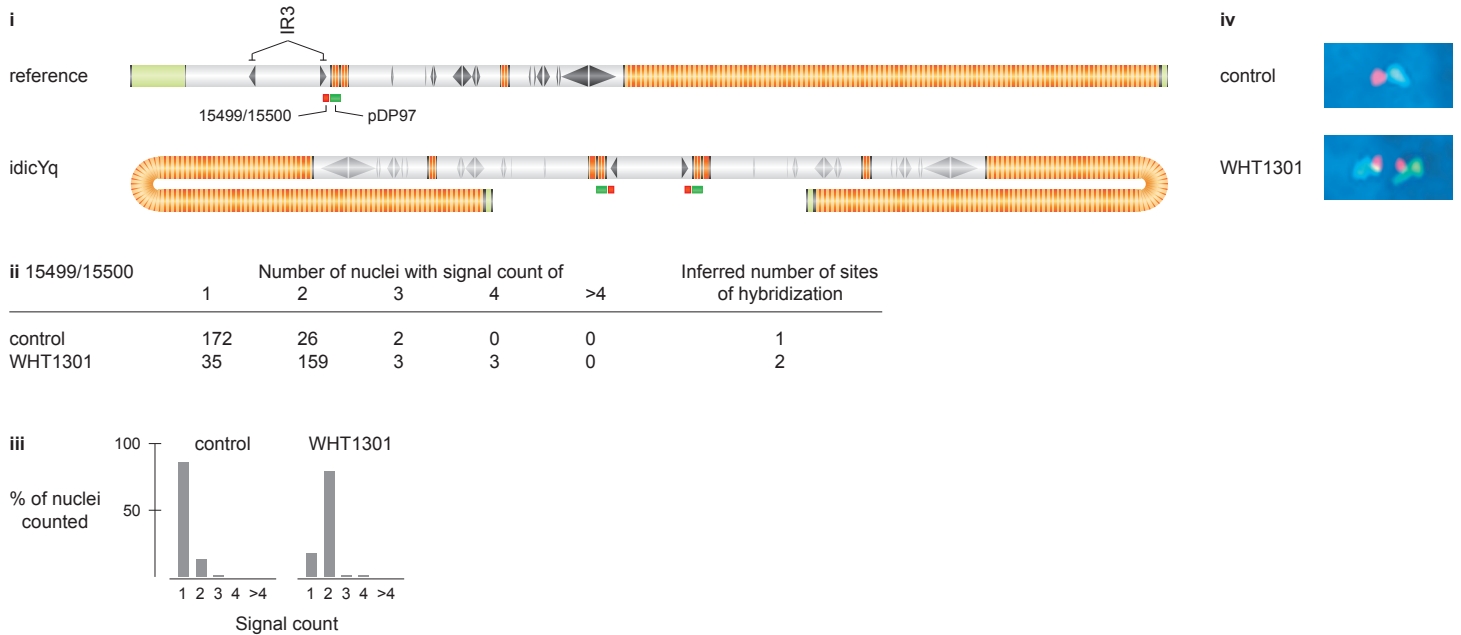

**Figure S8. Results of testing centromere function in structurally dicentric (idicYp) chromosomes**

(A) Schematic representation of the reference Y chromosome. FISH probe pDP97 (to centromeric alpha satellite [DYZ3] repeats), in green, identifies structural Y-chromosome centromeres. Anti-CENP-E antibody staining, in red, recognizes centromere protein CENP-E, which localizes exclusively to active centromeres.

(B) Summary of IF-FISH counting results for each of 13 cases tested. At left: Intercentromeric distances are shown above schematics of each type of idicYp tested. At right: Counting results of testing 13 cases for centromere activity.

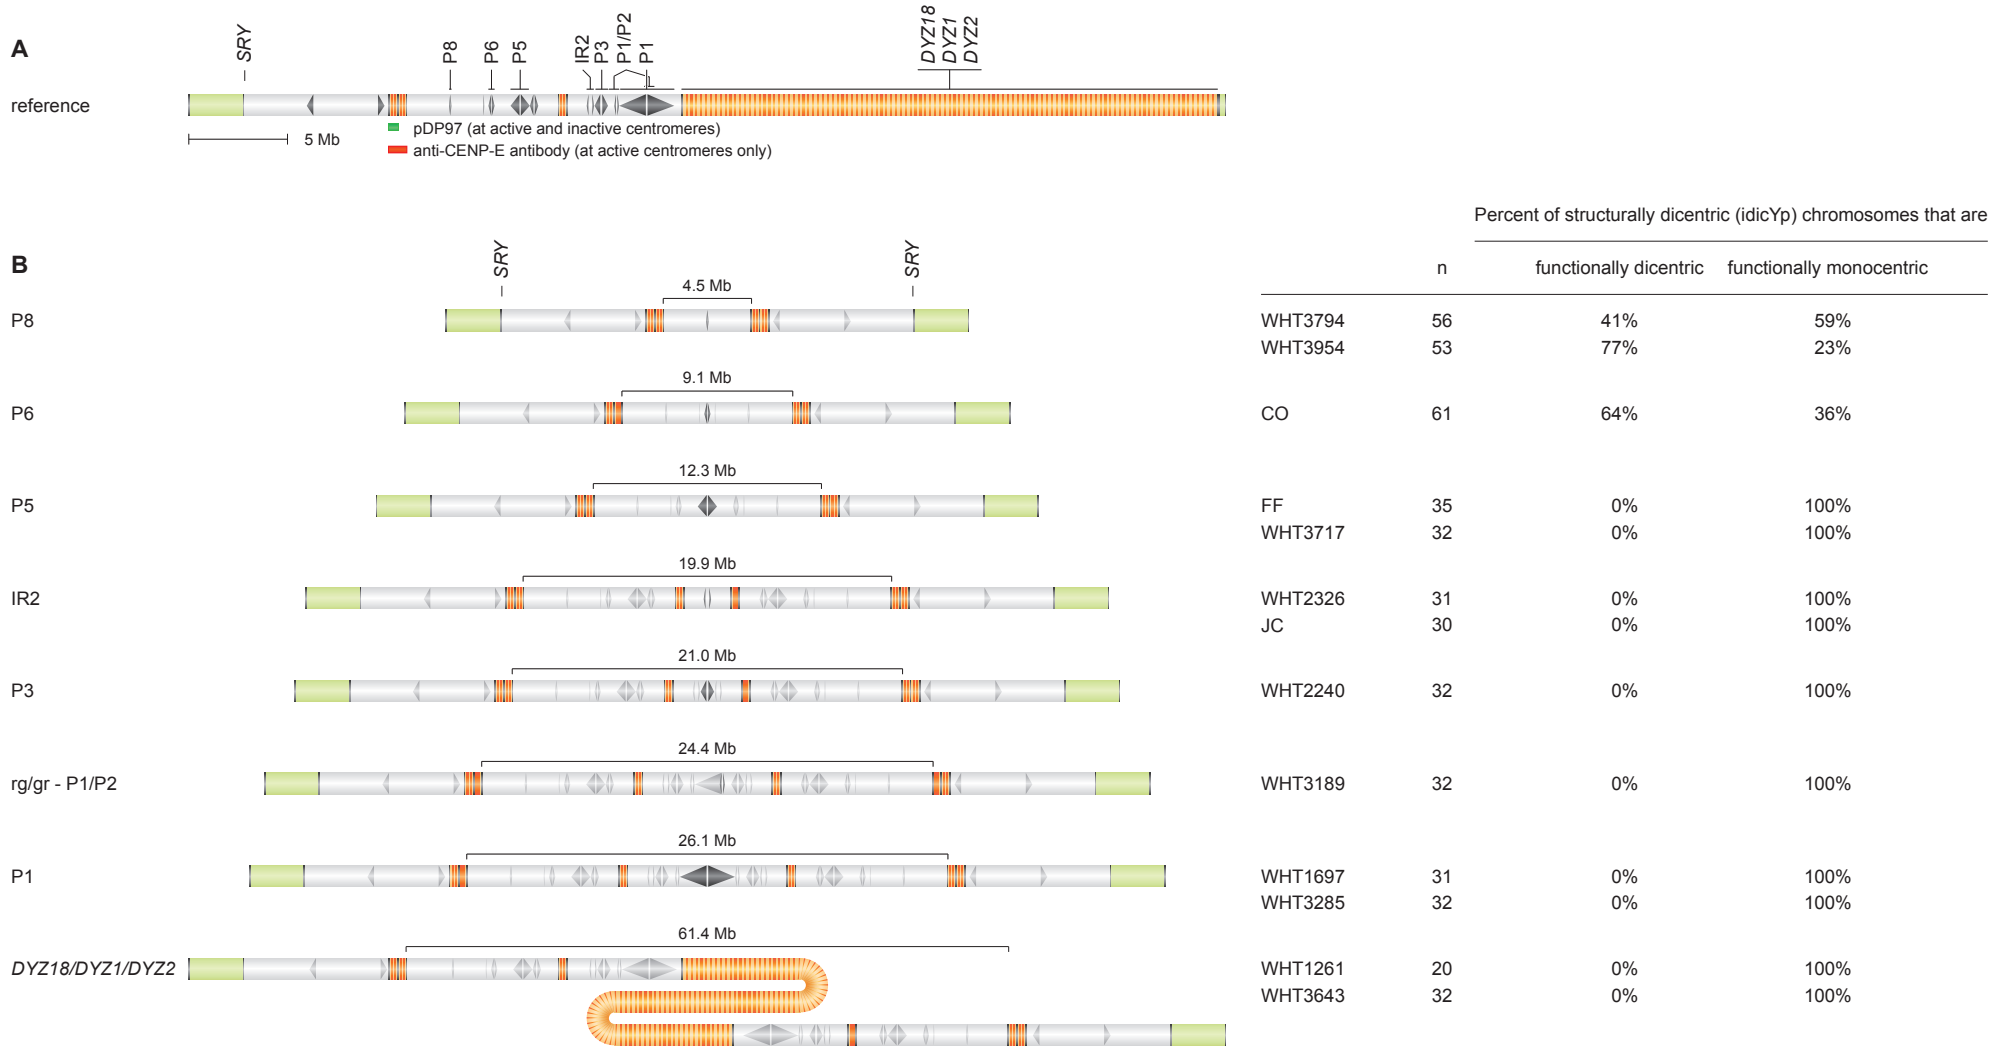



**Figure S9 continued. Molecular signatures of 23 idicY and isoY chromosomes predicted to form by ectopic homologous recombination events involving MSY palindromes, inverted repeats, and highly repetitive heterochromatic regions**

**B**

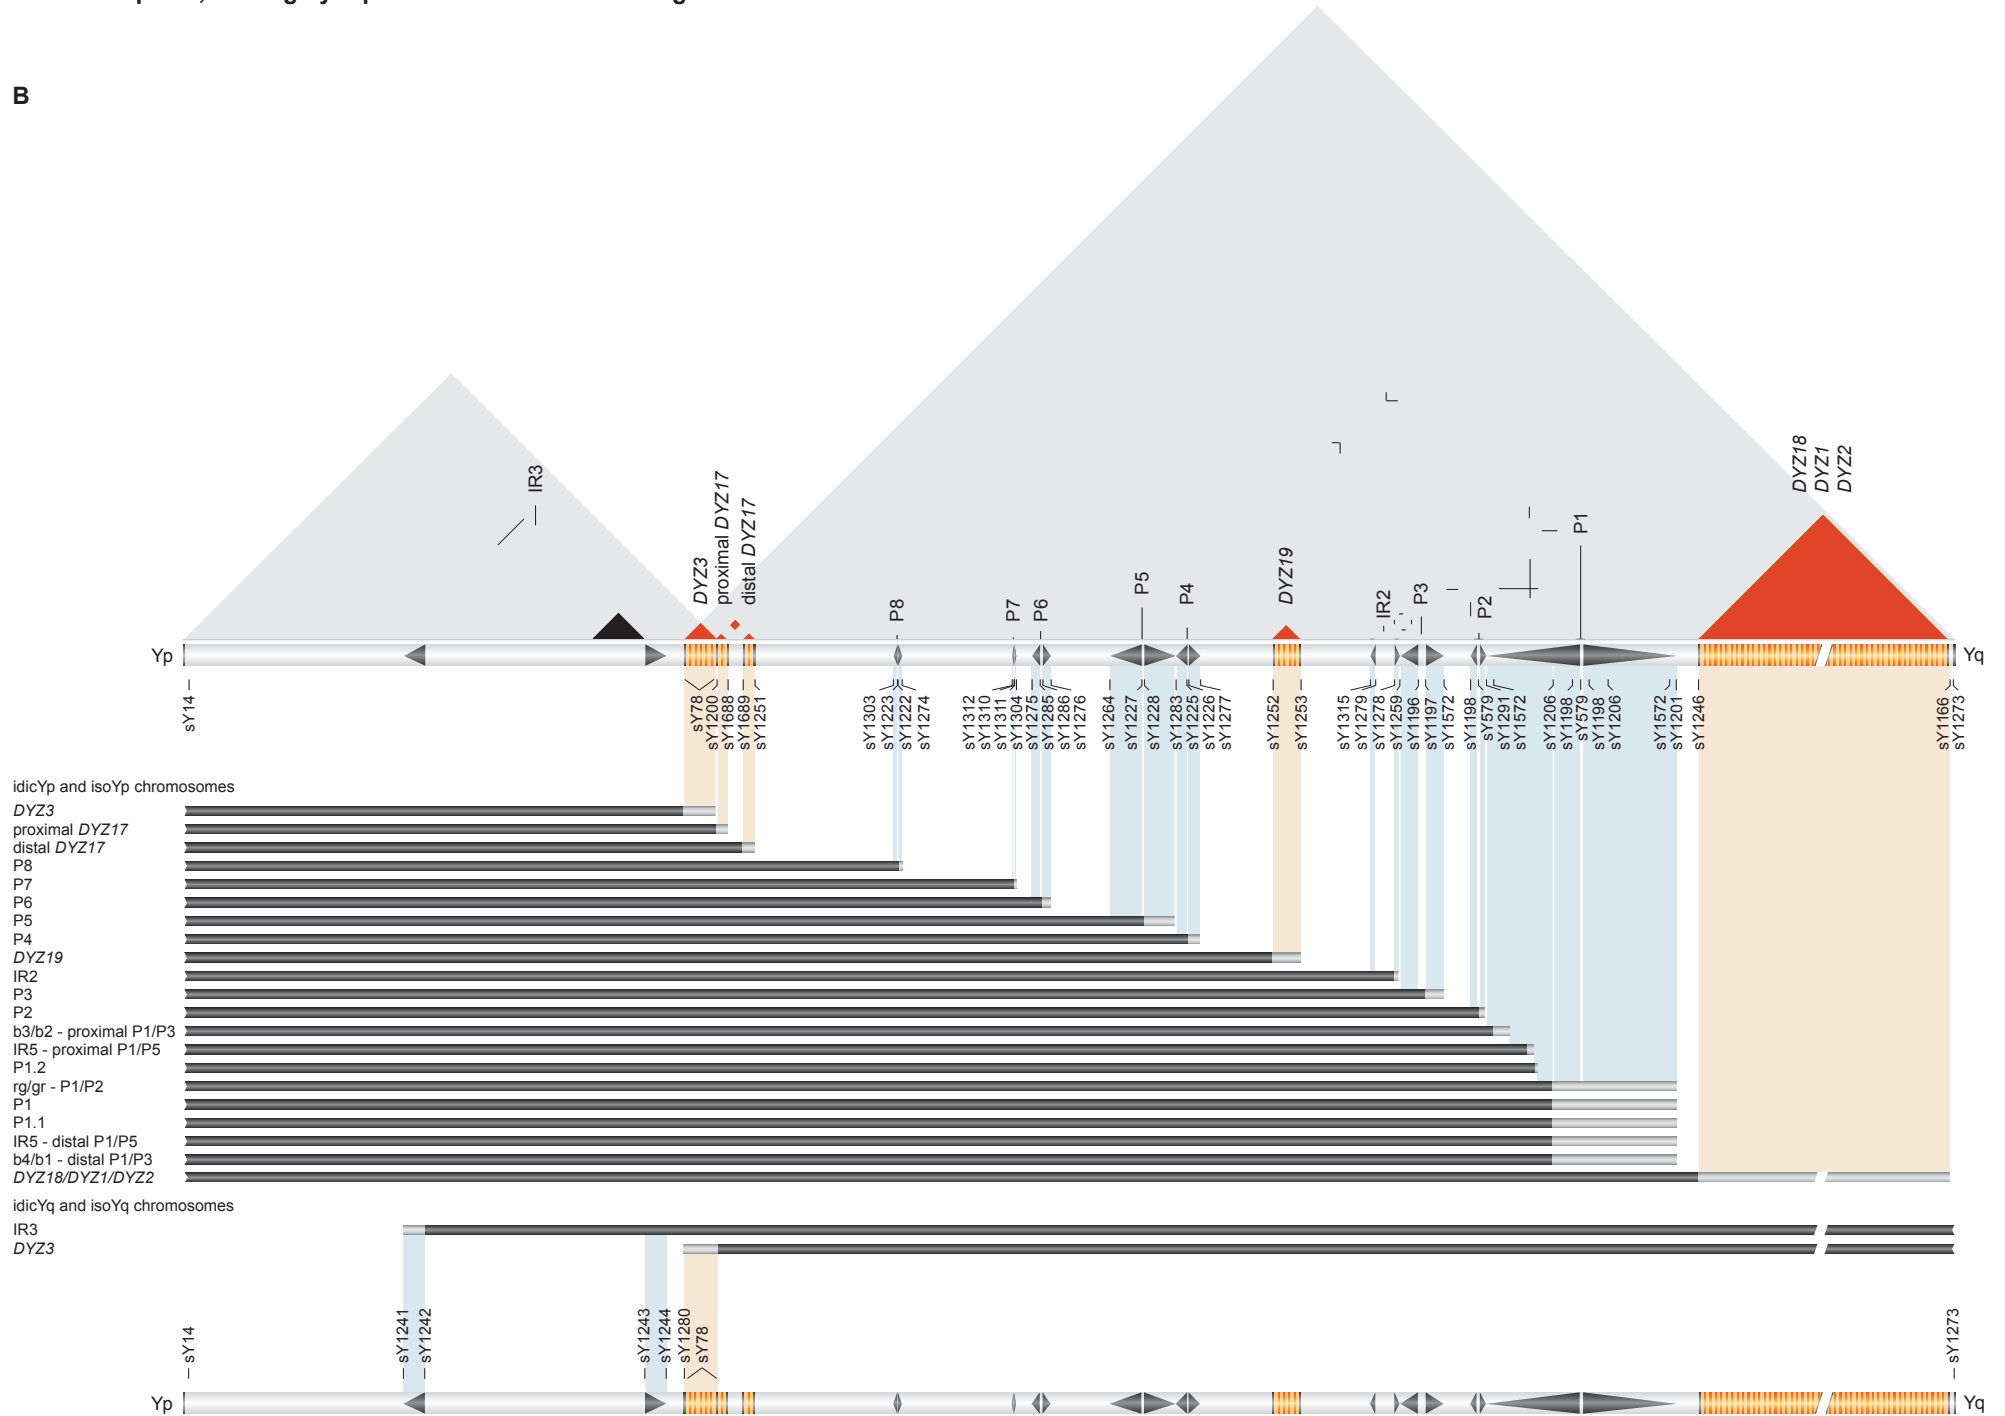

**Table S1. Deletion breakpoint intervals of 85 individuals with breakpoints in the long arm (Yq) or centromere, and of two individuals with breakpoints in the short arm (Yp) of the MSY**

In each table, individuals are ordered by breakpoint location in the Y chromosome. For each individual, the breakpoint interval is indicated by the most distal STS that was present and the most proximal STS that was absent.

**Table S1A. Deletion breakpoint intervals of 49 individuals with breakpoints in distal arms of palindromes or inverted repeats on Yq**

The 49 individuals with breakpoints in distal arms of palindromes or inverted repeats exhibit molecular signatures consistent with an idicYp formed by the proposed model. See Figures 2D and S2C for STS deletion mapping results, Table S4B for GenBank accession numbers of STSs.

| Case identifier | Distal STS present | Proximal STS absent | Inferred location of breakpoint | References                                   |
|-----------------|--------------------|---------------------|---------------------------------|----------------------------------------------|
| WHT165          | sY1222             | sY1274              | Distal arm of P8                |                                              |
| WHT1876         | sY1222             | sY1274              | Distal arm of P8                | Vollrath et al., 1992; Lahn et al., 1994     |
| WHT3062         | sY1222             | sY1274              | Distal arm of P8                |                                              |
| WHT3794         | sY1222             | sY1274              | Distal arm of P8                |                                              |
| WHT3954         | sY1222             | sY1274              | Distal arm of P8                |                                              |
| CO              | sY1286             | sY1276              | Distal arm of P6                | O'Reilly et al., 1992; Vollrath et al., 1992 |
| FF              | sY1228             | sY1283              | Distal arm of P5                | O'Reilly et al., 1992; Vollrath et al., 1992 |
| RS              | sY1228             | sY1283              | Distal arm of P5                | O'Reilly et al., 1992; Vollrath et al., 1992 |
| WHT2024         | sY1228             | sY1283              | Distal arm of P5                | Vollrath et al., 1992                        |
| WHT2171         | sY1228             | sY1283              | Distal arm of P5                | Vollrath et al., 1992                        |
| WHT3103         | sY1228             | sY1283              | Distal arm of P5                | Silber et al., 1998                          |
| WHT3717         | sY1228             | sY1283              | Distal arm of P5                |                                              |
| WHT3894         | sY1228             | sY1283              | Distal arm of P5                |                                              |
| WHT4064         | sY1228             | sY1283              | Distal arm of P5                |                                              |
| WHT4351         | sY1228             | sY1283              | Distal arm of P5                |                                              |
| WHT4410         | sY1228             | sY1283              | Distal arm of P5                |                                              |
| WHT4818         | sY1228             | sY1283              | Distal arm of P5                |                                              |
| WHT5060         | sY1228             | sY1283              | Distal arm of P5                |                                              |
| WHT5139         | sY1228             | sY1283              | Distal arm of P5                |                                              |
| WHT495          | sY1226             | sY1277              | Distal arm of P4                | Vollrath et al., 1992                        |
| WHT1195         | sY1226             | sY1277              | Distal arm of P4                | Vollrath et al., 1992                        |
| WHT1658         | sY1226             | sY1277              | Distal arm of P4                | Vollrath et al., 1992                        |
| WHT2170         | sY1226             | sY1277              | Distal arm of P4                | Vollrath et al., 1992                        |
| WHT4093         | sY1226             | sY1277              | Distal arm of P4                |                                              |
| WHT5096         | sY1226             | sY1277              | Distal arm of P4                |                                              |
| WHT5108         | sY1226             | sY1277              | Distal arm of P4                |                                              |
| WHT5234         | sY1226             | sY1277              | Distal arm of P4                |                                              |
| WHT5643         | sY1226             | sY1277              | Distal arm of P4                |                                              |

**Table S1A continued. Deletion breakpoint intervals of 49 individuals with breakpoints in distal arms of palindromes or inverted repeats on Yq**

| Case identifier | Distal STS present | Proximal STS absent | Inferred location of breakpoint | References                                                       |
|-----------------|--------------------|---------------------|---------------------------------|------------------------------------------------------------------|
| DM              | sY1278             | sY1259              | Distal arm of IR2               | O'Reilly et al., 1992; Vollrath et al., 1992; Reijo et al., 1995 |
| JC              | sY1278             | sY1259              | Distal arm of IR2               | O'Reilly et al., 1992; Vollrath et al., 1992; Reijo et al., 1995 |
| WHT1318         | sY1278             | sY1259              | Distal arm of IR2               | Cantrell et al., 1992; Vollrath et al., 1992; Reijo et al., 1995 |
| WHT2326         | sY1278             | sY1259              | Distal arm of IR2               |                                                                  |
| WHT2557         | sY1278             | sY1259              | Distal arm of IR2               |                                                                  |
| WHT746          | sY1197             | sY1572              | Distal arm of P3                | Vollrath et al., 1992                                            |
| WHT1434         | sY1197             | sY1572              | Distal arm of P3                | Vollrath et al., 1992; Reijo et al., 1995                        |
| WHT2064         | sY1197             | sY1572              | Distal arm of P3                | Vollrath et al., 1992; Reijo et al., 1995                        |
| WHT2240         | sY1197             | sY1572              | Distal arm of P3                | Vollrath et al., 1992; Reijo et al., 1995                        |
| WHT1343         | sY579              | sY1291              | Distal arm of P2                |                                                                  |
| WHT1009         | sY1206             | sY1201              | Distal arm of P1                |                                                                  |
| WHT1078         | sY1206             | sY1201              | Distal arm of P1                | Vollrath et al., 1992; Reijo et al., 1995                        |
| WHT1300         | sY1206             | sY1201              | Distal arm of P1                |                                                                  |
| WHT1697         | sY1206             | sY1201              | Distal arm of P1                |                                                                  |
| WHT1871         | sY1206             | sY1201              | Distal arm of P1                |                                                                  |
| WHT2229         | sY1206             | sY1201              | Distal arm of P1                | Vollrath et al., 1992; Reijo et al., 1995                        |
| WHT2839         | sY1206             | sY1201              | Distal arm of P1                |                                                                  |
| WHT3189         | sY1206             | sY1201              | Distal arm of P1                |                                                                  |
| WHT3285         | sY1206             | sY1201              | Distal arm of P1                |                                                                  |
| WHT3311         | sY1206             | sY1201              | Distal arm of P1                |                                                                  |
| WHT3570         | sY1206             | sY1201              | Distal arm of P1                |                                                                  |

**Table S1B. Deletion breakpoint intervals of six individuals with breakpoints in proximal arms of palindromes on Yq**

In six cases with breakpoints in proximal arms of palindromes, breakpoints were fine-mapped with MSY Breakpoint Mapper, a database of Y-specific STSs (Lange et al., 2008). See Figures 2D and S2C for STS deletion mapping results, Table S4C for GenBank accession numbers of STSs.

| Case identifier      | Distal STS present | Proximal STS absent | Inferred location of breakpoint | References                                 |
|----------------------|--------------------|---------------------|---------------------------------|--------------------------------------------|
| WHT2063              | sY595              | sY1282              | Proximal arm of P8              | Vollrath et al., 1992                      |
| WHT1162              | sY1774             | sY1746              | Proximal arm of P8              | Goulmy et al., 1983; Vollrath et al., 1992 |
| WHT5318              | sY1235             | sY828               | Proximal arm of P5              |                                            |
| WHT1231              | sY1741             | sY1750              | Proximal arm of P4              | Vollrath et al., 1992                      |
| WHT496               | sY1740             | sY1742              | Proximal arm of P1              | Vollrath et al., 1992; Reijo et al., 1995  |
| WHT2856 <sup>a</sup> | sY1768             | sY1770              | Proximal arm of P1              |                                            |

<sup>a</sup>The deletion in WHT2856 occurs on an inverted variant of palindromes P1 and P2 (see Repping et al., 2006).



**Table S1C. Deletion breakpoint interval of one individual with a breakpoint in the spacer of Yq inverted repeat IR2**

In one case with a breakpoint in the spacer of Yq inverted repeat, the breakpoint was fine-mapped with MSY Breakpoint Mapper, a database of Y-specific STSs (Lange et al., 2008). See Figures 2D and S2C for STS deletion mapping results, Table S4C for GenBank accession numbers of STSs.

| Case identifier | Distal STS present | Proximal STS absent | Inferred location of breakpoint | References |
|-----------------|--------------------|---------------------|---------------------------------|------------|
| WHT5557         | sY3228             | sY3223              | In spacer of IR2                |            |

**Table S1D. Deletion breakpoint intervals of 20 individuals with breakpoints in pericentromeric euchromatin or in non-palindromic euchromatin on Yq**  
 In 20 cases with breakpoints in pericentromeric euchromatin or non-palindromic euchromatin on Yq, breakpoints were fine-mapped with MSY Breakpoint Mapper, a database of Y-specific STSs (Lange et al., 2008). See Figures 2D and S2C for STS deletion mapping results, Table S4C for GenBank accession numbers of STSs.

| Case identifier | Distal STS present | Proximal STS absent | Inferred location of breakpoint | References                               |
|-----------------|--------------------|---------------------|---------------------------------|------------------------------------------|
| WHT1923         | sY1688             | sY1689              | Pericentromeric euchromatin     | Vollrath et al., 1992                    |
| WHT2259         | sY1688             | sY1689              | Pericentromeric euchromatin     |                                          |
| WHT4497         | sY183              | sY81                | Between centromere and P8       |                                          |
| WHT1225         | sY81               | sY2303              | Between centromere and P8       |                                          |
| WHT4481         | sY629              | sY630               | Between centromere and P8       |                                          |
| WHT3814         | sY1744             | sY1743              | Between centromere and P8       |                                          |
| WHT298          | APXLP-5            | sY2314              | Between centromere and P8       |                                          |
| WHT5291         | sY1184             | UTY-28              | Between centromere and P8       |                                          |
| WHT1874         | sY1767             | sY1769              | Between centromere and P8       | Vollrath et al., 1992                    |
| WHT5431         | sY2372             | sY89                | Between centromere and P8       |                                          |
| WHT3673         | sY1759             | sY1762              | Between centromere and P8       |                                          |
| WHT5392         | sY1899             | sY1900              | Between centromere and P8       |                                          |
| WHT2317         | sY2370             | sY2382              | Between P8 and P7               |                                          |
| WHT4490         | sY1773             | NLGN4Y-2            | Between P8 and P7               |                                          |
| WHT3502         | sY1753             | sY1748              | Between P6 and P5               |                                          |
| WHT3659         | sY1751             | sY1752              | Between P4 and <i>DYZ19</i>     |                                          |
| WHT1832         | sY1760             | sY1755              | Between P4 and <i>DYZ19</i>     | Vollrath et al., 1992; Lahn et al., 1994 |
| WHT1820         | sY1763             | sY1761              | Between <i>DYZ19</i> and IR2    | Vollrath et al., 1992                    |
| WHT3224         | sY1572             | sY1192              | Between P3 and P2               |                                          |
| WHT3384         | sY1756             | sY1764              | Between P3 and P2               |                                          |

**Table S1E. Deletion breakpoint intervals of nine individuals with breakpoints in one of four highly repetitive heterochromatic regions in the centromere or Yq and exhibiting molecular signatures consistent with an isoYp or idicYp formed by the proposed model**  
 See Figures 2D and S2C for STS deletion mapping results, Table S4B for GenBank accession numbers of STSs.

| Case identifier | Distal STS present | Proximal STS absent | Inferred location of breakpoint | References                                                  |
|-----------------|--------------------|---------------------|---------------------------------|-------------------------------------------------------------|
| WHT1763         | sY78               | sY1200              | <i>DYZ3</i>                     | Vollrath et al., 1992                                       |
| WHT1983         | sY78               | sY1200              | <i>DYZ3</i>                     | Lahn et al., 1994                                           |
| WHT2475         | sY78               | sY1200              | <i>DYZ3</i>                     | Reijo et al., 1995; Reijo et al., 1996; Silber et al., 1998 |
| WHT1781B        | sY1200             | sY1688              | Proximal <i>DY17</i>            | Vollrath et al., 1992                                       |
| WHT2339         | sY1200             | sY1688              | Proximal <i>DY17</i>            |                                                             |
| WHT1826         | sY1689             | sY1251              | Distal <i>DYZ17</i>             | Vollrath et al., 1992                                       |
| WHT4596         | sY1689             | sY1251              | Distal <i>DYZ17</i>             |                                                             |
| WHT1261         | sY1246             | sY1166              | <i>DYZ18/DYZ1/DYZ2</i>          |                                                             |
| WHT3643         | sY1246             | sY1166              | <i>DYZ18/DYZ1/DYZ2</i>          |                                                             |

**Table S1F. Deletion breakpoint intervals of two individuals with breakpoints in the Yp inverted repeat IR3 and exhibiting molecular signatures consistent with an idicYq formed by the proposed model**

See Figures 5C and S6C for STS deletion mapping results, Table S4D for GenBank accession numbers of STSs.

| Case identifier | Distal STS present | Proximal STS absent | Inferred location of breakpoint | References            |
|-----------------|--------------------|---------------------|---------------------------------|-----------------------|
| GM01709         | sY1242             | sY1241              | Distal arm of IR3               | Aronson et al., 1983  |
| WHT1301         | sY1242             | sY1241              | Distal arm of IR3               | Vollrath et al., 1992 |

**Table S2. Characteristics of observed and predicted idicY and isoY chromosomes**

**Table S2A. IdicY and isoY chromosomes characterized in this study**

As crossing over can occur in either the left or right arm of a palindrome, the target size is the sum of the two arms. Table S2B for references and additional data.

|                             | Targeted repeat        | Target size (kb) | IdicY or isoY size (Mb) | Numbers of cases                      |                                                             |                                                                 |
|-----------------------------|------------------------|------------------|-------------------------|---------------------------------------|-------------------------------------------------------------|-----------------------------------------------------------------|
|                             |                        |                  |                         | STS mapping consistent with our model | IdicY or isoY confirmed by SRY/cen FISH (observed/scorable) | Proposed mechanism validated by specific FISH (observed/tested) |
| <b>idicYp chromosomes</b>   |                        |                  |                         |                                       |                                                             |                                                                 |
| euchromatic breakpoints     | P8                     | 72               | 28.6                    | 5                                     | 3/3                                                         | 3/3                                                             |
|                             | P6                     | 220              | 33.1                    | 1                                     | 1/1                                                         | 1/1                                                             |
|                             | P5                     | 992              | 36.4                    | 13                                    | 7/7                                                         | 6/6                                                             |
|                             | P4                     | 380              | 37.8                    | 9                                     | 1/1                                                         | 1/1                                                             |
|                             | IR2                    | 124              | 43.9                    | 5                                     | 3/3                                                         | 3/3                                                             |
|                             | P3                     | 566              | 45.0                    | 4                                     | 3/3                                                         | 3/3                                                             |
|                             | P2                     | 244              | 46.9                    | 1                                     | not scorable                                                | not tested                                                      |
|                             | P1                     | 2,900            | 50.1                    | 10                                    | 6/6                                                         | 5/5                                                             |
|                             | P1/P2                  | 1,116            | 48.5                    | 1                                     | 1/1                                                         | 1/1                                                             |
|                             |                        |                  | Total                   | 49                                    | 25/25                                                       | 23/23                                                           |
| heterochromatic breakpoints | <i>DYZ18/DYZ1/DYZ2</i> | 31,700           | 85.4                    | 2                                     | 2/2                                                         | 2/2                                                             |
|                             |                        |                  | Total                   | 2                                     | 2/2                                                         | 2/2                                                             |
| <b>isoYp chromosomes</b>    |                        |                  |                         |                                       |                                                             |                                                                 |
| heterochromatic breakpoints | <i>DYZ3</i>            | 500              | 21.9                    | 3                                     | 2/2                                                         | 2/2                                                             |
|                             | proximal <i>DYZ17</i>  | 200              | 22.6                    | 2                                     | 1/1                                                         | 1/1                                                             |
|                             | distal <i>DYZ17</i>    | 200              | 23.9                    | 2                                     | not tested                                                  | not tested                                                      |
|                             |                        |                  | Total                   | 7                                     | 3/3                                                         | 3/3                                                             |
| <b>idicYq chromosomes</b>   |                        |                  |                         |                                       |                                                             |                                                                 |
| euchromatic breakpoints     | IR3                    | 596              | 101.4                   | 2                                     | 1/1                                                         | 1/1                                                             |
|                             |                        |                  | Total                   | 2                                     | 1/1                                                         | 1/1                                                             |
|                             |                        |                  | <b>Grand total</b>      | <b>60</b>                             | <b>31/31</b>                                                | <b>29/29</b>                                                    |

**Decision tree of analyzing 2,380 cases for presence of idicY and isoY chromosomes**

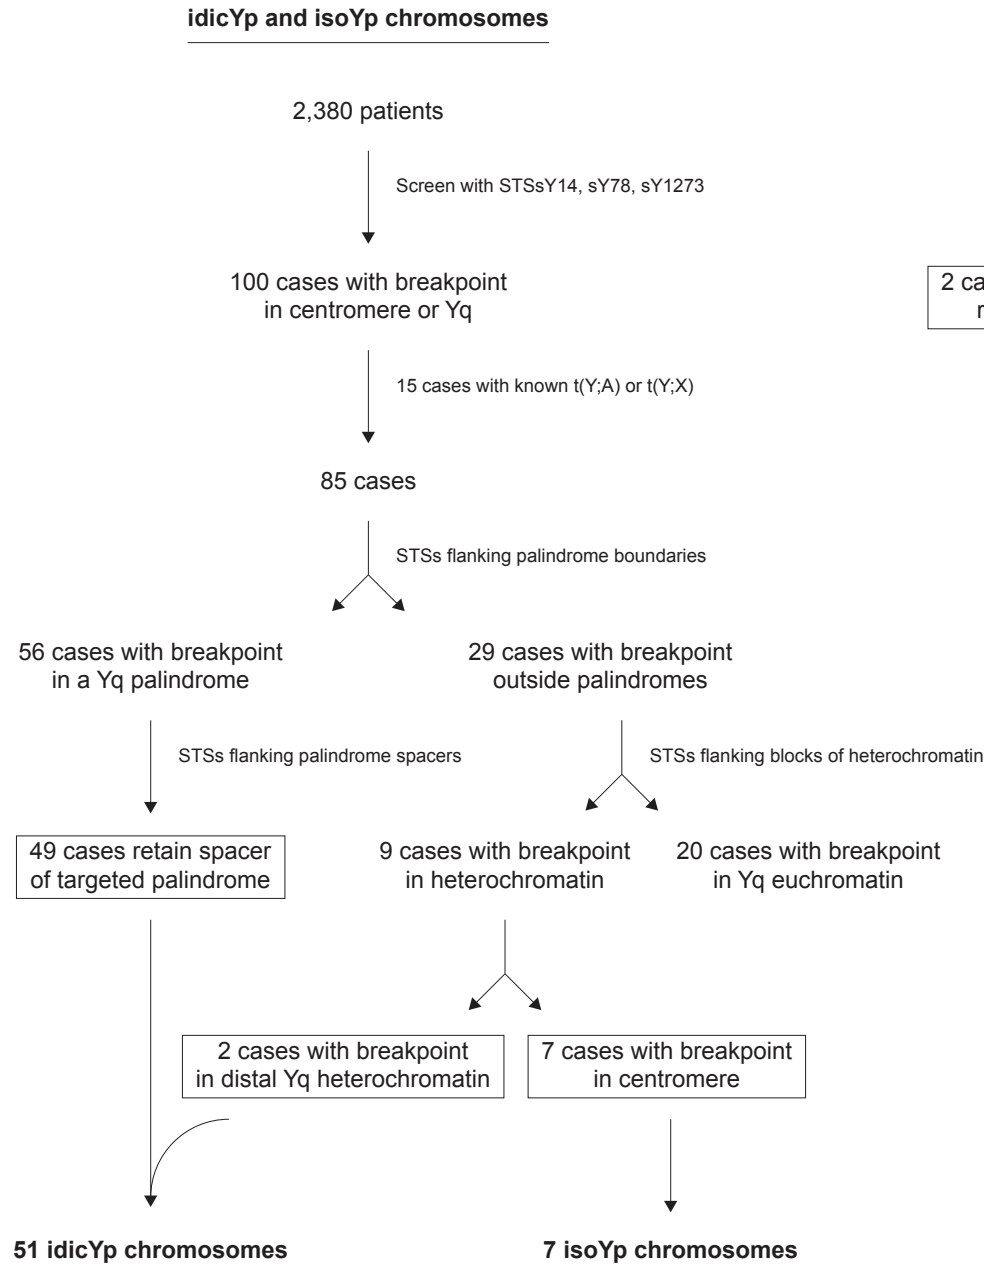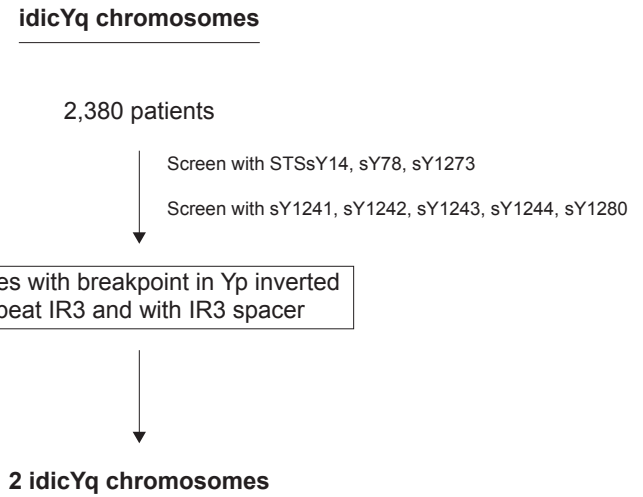

**Table S2B. Target size, isochromosome size, and molecular signatures of 23 idicY and isoY chromosomes predicted to form by ectopic homologous recombination events involving MSY palindromes, inverted repeats, and highly repetitive heterochromatic regions**

Target repeat sizes and isochromosome sizes are based on: euchromatic MSY sequence (Skaletsky et al., 2003) except average *TSPY* array, 673 kb (Repping et al., 2006); *DYZ3* array, 500 kb (Skaletsky et al., 2003); proximal *DYZ17* array, 200 kb, pericentromeric euchromatin, 449 kb, and distal *DYZ17* array, 200 kb (Kirsch et al., 2005); *DYZ19* array, 330 kb (our unpublished data); PAR1, 2.71, and PAR2, 335 kb (NCBI human genome assembly Build 36); estimated total Y chromosome, 59 Mb (Morton, 1991); *DYZ18/DYZ1/DYZ2* array, 31.7 Mb (calculated from referenced figures). For each isochromosome, the breakpoint interval is indicated by the most distal STS predicted to be present and the most proximal STS predicted to be absent. See Figures S9A and S9B for predicted STS deletion mapping results.

| Targeted repeat              | Single target size (kb) | Target size (kb) | IdicY or isoY size (Mb) | Distal STS present | Proximal STS absent |
|------------------------------|-------------------------|------------------|-------------------------|--------------------|---------------------|
| idicYp and isoYp chromosomes |                         |                  |                         |                    |                     |
| <i>DYZ3</i>                  | array                   | 500              | 21.9                    | sY78               | sY1200              |
| proximal <i>DYZ17</i>        | array                   | 200              | 22.6                    | sY1200             | sY1688              |
| distal <i>DYZ17</i>          | array                   | 200              | 23.9                    | sY1689             | sY1251              |
| P8                           | 36                      | 72               | 28.6                    | sY1222             | sY1274              |
| P7                           | 8.7                     | 17.4             | 32.3                    | sY1311             | sY1304              |
| P6                           | 110                     | 220              | 33.1                    | sY1286             | sY1276              |
| P5                           | 496                     | 992              | 36.4                    | sY1228             | sY1283              |
| P4                           | 190                     | 380              | 37.8                    | sY1226             | sY1277              |
| <i>DYZ19</i>                 | array                   | 330              | 40.9                    | sY1252             | sY1253              |
| IR2                          | 62                      | 124              | 43.9                    | sY1278             | sY1259              |
| P3                           | 283                     | 566              | 45.0                    | sY1197             | sY1572              |
| P2                           | 122                     | 244              | 46.9                    | sY579              | sY1291              |
| b3/b2 - proximal P1/P3       | 229                     | 458              | 46.2                    | sY1291             | sY1206              |
| IR5 - proximal P1/P5         | 131                     | 262              | 42.5                    | sY1291             | sY1206              |
| P1.2                         | 9.9                     | 18.8             | 48.7                    | sY1291             | sY1206              |
| rg/gr - P1/P2                | 558                     | 1,116            | 48.5                    | sY1206             | sY1201              |
| P1                           | 1,450                   | 2,900            | 50.1                    | sY1206             | sY1201              |
| P1.1                         | 9.9                     | 18.8             | 51.5                    | sY1206             | sY1201              |
| IR5 - distal P1/P5           | 131                     | 262              | 44.0                    | sY1206             | sY1201              |
| b4/b1 - distal P1/P3         | 168                     | 336              | 48.6                    | sY1206             | sY1201              |
| <i>DYZ18/DYZ1/DYZ2</i>       | array                   | 31,700           | 85.4                    | sY1246             | sY1166              |
| idicYq and isoYq chromosomes |                         |                  |                         |                    |                     |
| IR3                          | 298                     | 596              | 101.4                   | sY1242             | sY1241              |
| <i>DYZ3</i>                  | array                   | 500              | 96.1                    | sY78               | sY1280              |

**Table S3. Y chromosome gene content and copy number of 23 idicY and isoY chromosomes predicted to form by ectopic homologous recombination events involving MSY palindromes, inverted repeats, and highly repetitive heterochromatic regions**  
 Based on euchromatic MSY sequence (Skaletsky et al., 2003) except average number of *TSPY* (Repping et al., 2006). See Figures 9A and 9B for additional information.

| Targeted repeat              | Copy number per gene |     |        |     |         |         |      |       |       |      |       |       |     |        |     |        |      |     |      |          |          |         |        |        |       |     |      |     |
|------------------------------|----------------------|-----|--------|-----|---------|---------|------|-------|-------|------|-------|-------|-----|--------|-----|--------|------|-----|------|----------|----------|---------|--------|--------|-------|-----|------|-----|
|                              | PAR1 genes           | SRY | RPS4Y1 | ZFY | TGIF2LY | PCDH11Y | TSPY | AMELY | TBL1Y | PRKY | USP9Y | DDX3Y | UTY | TMSB4Y | VCY | NLGN4Y | XKRY | CDY | HSFY | CYorf15A | CYorf15B | JARID1D | EIF1AY | RPS4Y2 | RBMY1 | PRY | BPY2 | DAZ |
| Reference                    | 1                    | 1   | 1      | 1   | 1       | 1       | 33   | 1     | 1     | 1    | 1     | 1     | 1   | 1      | 2   | 1      | 2    | 4   | 2    | 1        | 1        | 1       | 1      | 1      | 6     | 2   | 3    | 4   |
| idicYp and isoYp chromosomes |                      |     |        |     |         |         |      |       |       |      |       |       |     |        |     |        |      |     |      |          |          |         |        |        |       |     |      |     |
| <i>DYZ3</i>                  | 2                    | 2   | 2      | 2   | 2       | 2       | 66   | 2     | 2     | 2    | 0     | 0     | 0   | 0      | 0   | 0      | 0    | 0   | 0    | 0        | 0        | 0       | 0      | 0      | 0     | 0   | 0    | 0   |
| proximal <i>DYZ17</i>        | 2                    | 2   | 2      | 2   | 2       | 2       | 66   | 2     | 2     | 2    | 0     | 0     | 0   | 0      | 0   | 0      | 0    | 0   | 0    | 0        | 0        | 0       | 0      | 0      | 0     | 0   | 0    | 0   |
| distal <i>DYZ17</i>          | 2                    | 2   | 2      | 2   | 2       | 2       | 66   | 2     | 2     | 2    | 0     | 0     | 0   | 0      | 0   | 0      | 0    | 0   | 0    | 0        | 0        | 0       | 0      | 0      | 0     | 0   | 0    | 0   |
| P8                           | 2                    | 2   | 2      | 2   | 2       | 2       | 66   | 2     | 2     | 2    | 2     | 2     | 2   | 2      | 2   | 0      | 0    | 0   | 0    | 0        | 0        | 0       | 0      | 0      | 0     | 0   | 0    | 0   |
| P7                           | 2                    | 2   | 2      | 2   | 2       | 2       | 66   | 2     | 2     | 2    | 2     | 2     | 2   | 2      | 4   | 2      | 0    | 0   | 0    | 0        | 0        | 0       | 0      | 0      | 0     | 0   | 0    | 0   |
| P6                           | 2                    | 2   | 2      | 2   | 2       | 2       | 66   | 2     | 2     | 2    | 2     | 2     | 2   | 2      | 4   | 2      | 0    | 0   | 0    | 0        | 0        | 0       | 0      | 0      | 0     | 0   | 0    | 0   |
| P5                           | 2                    | 2   | 2      | 2   | 2       | 2       | 66   | 2     | 2     | 2    | 2     | 2     | 2   | 2      | 4   | 2      | 2    | 2   | 0    | 0        | 0        | 0       | 0      | 0      | 0     | 0   | 0    | 0   |
| P4                           | 2                    | 2   | 2      | 2   | 2       | 2       | 66   | 2     | 2     | 2    | 2     | 2     | 2   | 2      | 4   | 2      | 4    | 4   | 2    | 0        | 0        | 0       | 0      | 0      | 0     | 0   | 0    | 0   |
| <i>DYZ19</i>                 | 2                    | 2   | 2      | 2   | 2       | 2       | 66   | 2     | 2     | 2    | 2     | 2     | 2   | 2      | 4   | 2      | 4    | 4   | 4    | 2        | 2        | 2       | 0      | 0      | 0     | 0   | 0    | 0   |
| IR2                          | 2                    | 2   | 2      | 2   | 2       | 2       | 66   | 2     | 2     | 2    | 2     | 2     | 2   | 2      | 4   | 2      | 4    | 4   | 4    | 2        | 2        | 2       | 2      | 2      | 4     | 0   | 0    | 0   |
| P3                           | 2                    | 2   | 2      | 2   | 2       | 2       | 66   | 2     | 2     | 2    | 2     | 2     | 2   | 2      | 4   | 2      | 4    | 4   | 4    | 2        | 2        | 2       | 2      | 2      | 10    | 2   | 0    | 0   |
| P2                           | 2                    | 2   | 2      | 2   | 2       | 2       | 66   | 2     | 2     | 2    | 2     | 2     | 2   | 2      | 4   | 2      | 4    | 4   | 4    | 2        | 2        | 2       | 2      | 2      | 12    | 4   | 2    | 2   |
| b3/b2 - proximal P1/P3       | 2                    | 2   | 2      | 2   | 2       | 2       | 66   | 2     | 2     | 2    | 2     | 2     | 2   | 2      | 4   | 2      | 4    | 4   | 4    | 2        | 2        | 2       | 2      | 2      | 12    | 4   | 1    | 2   |
| IR5 - proximal P1/P5         | 2                    | 2   | 2      | 2   | 2       | 2       | 66   | 2     | 2     | 2    | 2     | 2     | 2   | 2      | 4   | 2      | 3    | 4   | 2    | 1        | 1        | 1       | 1      | 1      | 6     | 2   | 1    | 2   |
| P1.2                         | 2                    | 2   | 2      | 2   | 2       | 2       | 66   | 2     | 2     | 2    | 2     | 2     | 2   | 2      | 4   | 2      | 4    | 6   | 4    | 2        | 2        | 2       | 2      | 2      | 12    | 4   | 2    | 4   |
| rg/gr - P1/P2                | 2                    | 2   | 2      | 2   | 2       | 2       | 66   | 2     | 2     | 2    | 2     | 2     | 2   | 2      | 4   | 2      | 4    | 5   | 4    | 2        | 2        | 2       | 2      | 2      | 12    | 4   | 3    | 4   |
| P1                           | 2                    | 2   | 2      | 2   | 2       | 2       | 66   | 2     | 2     | 2    | 2     | 2     | 2   | 2      | 4   | 2      | 4    | 6   | 4    | 2        | 2        | 2       | 2      | 2      | 12    | 4   | 4    | 6   |
| P1.1                         | 2                    | 2   | 2      | 2   | 2       | 2       | 66   | 2     | 2     | 2    | 2     | 2     | 2   | 2      | 4   | 2      | 4    | 6   | 4    | 2        | 2        | 2       | 2      | 2      | 12    | 4   | 6    | 8   |
| IR5 - distal P1/P5           | 2                    | 2   | 2      | 2   | 2       | 2       | 66   | 2     | 2     | 2    | 2     | 2     | 2   | 2      | 4   | 2      | 3    | 4   | 2    | 1        | 1        | 1       | 1      | 1      | 6     | 2   | 3    | 4   |
| b4/b1 - distal P1/P3         | 2                    | 2   | 2      | 2   | 2       | 2       | 66   | 2     | 2     | 2    | 2     | 2     | 2   | 2      | 4   | 2      | 4    | 6   | 4    | 2        | 2        | 2       | 2      | 2      | 10    | 2   | 3    | 4   |
| <i>DYZ18/DYZ1/DYZ2</i>       | 2                    | 2   | 2      | 2   | 2       | 2       | 66   | 2     | 2     | 2    | 2     | 2     | 2   | 2      | 4   | 2      | 4    | 8   | 4    | 2        | 2        | 2       | 2      | 2      | 12    | 4   | 6    | 8   |
| idicYq and isoYq chromosomes |                      |     |        |     |         |         |      |       |       |      |       |       |     |        |     |        |      |     |      |          |          |         |        |        |       |     |      |     |
| IR3                          | 0                    | 0   | 0      | 0   | 0       | 0       | 33   | 1     | 1     | 1    | 2     | 2     | 2   | 2      | 4   | 2      | 4    | 8   | 2    | 2        | 2        | 2       | 2      | 12     | 4     | 6   | 8    |     |
| <i>DYZ3</i>                  | 0                    | 0   | 0      | 0   | 0       | 0       | 0    | 0     | 0     | 0    | 2     | 2     | 2   | 2      | 4   | 2      | 4    | 8   | 2    | 2        | 2        | 2       | 2      | 2      | 12    | 4   | 6    | 8   |



**Table S4. STSs used in the analysis of Y chromosome content**

In each table, STSs are ordered by location in the Y chromosome, from distal Yp to centromere on the short arm (Yp), and centromere to distal Yq on the long arm (Yq).

**Table S4A. Three STSs used in initial screening of 2,380 individuals for deletions in Yq**

See Figure 2A for locations of STSs.

| STS    | GenBank<br>Accession | Location in Y chromosome                             |
|--------|----------------------|------------------------------------------------------|
| sY14   | G38356               | Distal Yp gene <i>SRY</i>                            |
| sY78   | G38359               | <i>DYZ3</i> array in centromere                      |
| sY1273 | G75500               | Distal to <i>DYZ18/DYZ1/DYZ2</i> at boundary of PAR2 |

**Table S4B. Landmark STSs used to determine Y chromosome content in individuals in whom distal Yp STS sY14 and centromeric STS sY78 were present, and distal Yq STS sY1273 was absent**  
See Figures 2C, S2B, and S4B for locations of STSs.

| STS    | GenBank Accession | Location in Y chromosome                                                         |
|--------|-------------------|----------------------------------------------------------------------------------|
| sY78   | G38359            | <i>DYZ3</i> array in centromere                                                  |
| sY1200 | G75479            | Transition between centromeric <i>DYZ3</i> array and proximal <i>DYZ17</i> array |
| sY1688 | BV448840          | Transition between proximal <i>DYZ17</i> array and pericentromeric euchromatin   |
| sY1689 | BV448841          | Transition between pericentromeric euchromatin and distal <i>DYZ17</i> array     |
| sY1251 | G75496            | Transition between distal <i>DYZ17</i> and euchromatic Yq                        |
| sY1303 | G75514            | P8 proximal boundary                                                             |
| sY1223 | G75485            | P8 proximal flank of spacer                                                      |
| sY1222 | G73595            | P8 distal flank of spacer                                                        |
| sY1274 | G75501            | P8 distal boundary                                                               |
| sY1312 | G73594            | P7 proximal boundary                                                             |
| sY1310 | G73592            | P7 proximal flank of spacer                                                      |
| sY1311 | G73593            | P7 distal flank of spacer                                                        |
| sY1304 | G73586            | P7 distal boundary                                                               |
| sY1275 | G75502            | P6 proximal boundary                                                             |
| sY1285 | G73584            | P6 proximal flank of spacer                                                      |
| sY1286 | G73585            | P6 distal flank of spacer                                                        |
| sY1276 | G75503            | P6 distal boundary                                                               |
| sY1264 | G72346            | P5 proximal boundary                                                             |
| sY1227 | G72343            | P5 proximal flank of spacer                                                      |
| sY1228 | G72344            | P5 distal flank of spacer                                                        |
| sY1283 | G75508            | P5 distal boundary, P4 proximal boundary                                         |
| sY1225 | G73582            | P4 proximal flank of spacer                                                      |
| sY1226 | G73583            | P4 distal flank of spacer                                                        |
| sY1277 | BV703587          | P4 distal boundary                                                               |
| sY1252 | G75497            | <i>DYZ19</i> proximal boundary                                                   |
| sY1253 | G75498            | <i>DYZ19</i> distal boundary                                                     |
| sY1315 | G75515            | IR2 proximal boundary                                                            |
| sY1279 | G75505            | IR2 proximal flank of spacer                                                     |
| sY1278 | G75504            | IR2 distal flank of spacer                                                       |
| sY1259 | BV444812          | IR2 distal boundary, P3 proximal boundary                                        |
| sY1196 | G67167            | P3 proximal flank of spacer                                                      |
| sY1197 | G67168            | P3 distal flank of spacer                                                        |
| sY1572 | BV444813          | P3 distal boundary                                                               |
| sY1198 | G67169            | Boundary between green and red amplicons in P2 and P1                            |
| sY579  | G63909            | Spacer of P2 and P1                                                              |
| sY1291 | G72340            | P2 distal boundary, P1 proximal boundary                                         |
| sY1206 | G67171            | Boundary between yellow and green amplicons in P1                                |
| sY1201 | G67170            | P1 distal boundary                                                               |
| sY1246 | G75492            | Proximal boundary between Yq euchromatin and <i>DYZ18/DYZ1/DYZ2</i>              |
| sY1166 | G66149            | Y-specific sequence distal to <i>DYZ18/DYZ1/DYZ2</i>                             |
| sY1273 | G75500            | Distal to <i>DYZ18/DYZ1/DYZ2</i> at boundary of PAR2                             |

**Table S4C. STSs that define breakpoint intervals in individuals with breakpoints in proximal arms of palindromes, in the spacer of inverted repeat IR2, in pericentromeric euchromatin, or in non-palindromic euchromatin on Yq**

See MSY Breakpoint Mapper (Lange et al., 2008) for locations of STSs.

| STS      | GenBank Accession | Location in Y chromosome                                                       |
|----------|-------------------|--------------------------------------------------------------------------------|
| sY1688   | BV448840          | Transition between proximal <i>DYZ17</i> array and pericentromeric euchromatin |
| sY1689   | BV448841          | Transition between pericentromeric euchromatin and distal <i>DYZ17</i> array   |
| sY183    | G66624            | Between centromere and P8                                                      |
| sY81     | G66519            | Between centromere and P8                                                      |
| sY2303   | G66185            | Between centromere and P8                                                      |
| sY629    | G65852            | Between centromere and P8                                                      |
| sY630    | G49201            | Between centromere and P8                                                      |
| sY1744   | BV682275          | Between centromere and P8                                                      |
| sY1743   | BV682274          | Between centromere and P8                                                      |
| APXLP-5  | BV678979          | Between centromere and P8                                                      |
| sY2314   | G66193            | Between centromere and P8                                                      |
| sY1184   | G64731            | Between centromere and P8                                                      |
| UTY-28   | BV979197          | Between centromere and P8                                                      |
| sY1767   | BV682298          | Between centromere and P8                                                      |
| sY1769   | BV682300          | Between centromere and P8                                                      |
| sY2372   | G66221            | Between centromere and P8                                                      |
| sY89     | G66625            | Between centromere and P8                                                      |
| sY1759   | BV682290          | Between centromere and P8                                                      |
| sY1762   | BV682293          | Between centromere and P8                                                      |
| sY1899   | BV694008          | Between centromere and P8                                                      |
| sY1900   | BV694009          | Between centromere and P8                                                      |
| sY595    | G34985            | Arms of P8                                                                     |
| sY1282   | BV681875          | Arms of P8                                                                     |
| sY1774   | BV682305          | Arms of P8                                                                     |
| sY1746   | BV682277          | Arms of P8                                                                     |
| sY2370   | G66219            | Between P8 and P7                                                              |
| sY2382   | G66229            | Between P8 and P7                                                              |
| sY1773   | BV682304          | Between P8 and P7                                                              |
| NLGN4Y-2 | BV679041          | Between P8 and P7                                                              |
| sY1753   | BV682284          | Between P7 and P6                                                              |
| sY1748   | BV682279          | Between P7 and P6                                                              |
| sY1235   | BV210874          | Arms of P5                                                                     |
| sY828    | BV703529          | Arms of P5                                                                     |
| sY1741   | BV682272          | Arms of P4                                                                     |
| sY1750   | BV682281          | Arms of P4                                                                     |
| sY1751   | BV682282          | Between P4 and <i>DYZ19</i>                                                    |
| sY1752   | BV682283          | Between P4 and <i>DYZ19</i>                                                    |
| sY1760   | BV682291          | Between P4 and <i>DYZ19</i>                                                    |
| sY1755   | BV682286          | Between P4 and <i>DYZ19</i>                                                    |
| sY1763   | BV682294          | Between <i>DYZ19</i> and IR2                                                   |
| sY1761   | BV682292          | Between <i>DYZ19</i> and IR2                                                   |
| sY3228   | BV704093          | In spacer of IR2                                                               |
| sY3223   | BV704088          | In spacer of IR2                                                               |
| sY1572   | BV444813          | P3 distal boundary                                                             |

**Table S4C continued. STSs that define breakpoint intervals in individuals with breakpoints in proximal arms of palindromes, in pericentromeric euchromatin, or in non-palindromic euchromatin on Yq**

| STS    | GenBank Accession | Location in Y chromosome                         |
|--------|-------------------|--------------------------------------------------|
| sY1192 | G67166            | Unique sequence between P3 and green amplicon g1 |
| sY1756 | BV682287          | Green amplicons                                  |
| sY1764 | BV682295          | Green amplicons                                  |
| sY1740 | BV682271          | Yellow amplicons                                 |
| sY1742 | BV682273          | Yellow amplicons                                 |
| sY1768 | BV682299          | Yellow amplicons                                 |
| sY1770 | BV682301          | Yellow amplicons                                 |

**Table S4D. Landmark STSs used to determine Y chromosome content in individuals in whom distal Yp STS sY14 was absent, and centromeric STS sY78 and distal Yq STS sY1273 were present**  
See Figures 5B and S6B for locations of STSs.

| STS    | GenBank Accession | Location in Y chromosome                      |
|--------|-------------------|-----------------------------------------------|
| sY14   | G38356            | Distal Yp in male-determining gene <i>SRY</i> |
| sY1241 | G75487            | IR3 distal boundary                           |
| sY1242 | G75488            | IR3 distal spacer flank                       |
| sY1243 | G75489            | IR3 proximal spacer flank                     |
| sY1244 | G75490            | IR3 proximal boundary                         |
| sY1280 | G75506            | Yp pericentromeric region                     |
| sY78   | G38359            | <i>DYZ3</i> array in centromere               |

**Table S4E. STS used to amplify and sequence coding region of male-determining gene *SRY* in females carrying *idicYp* chromosomes**

| STS     | GenBank<br>Accession | Location in Y chromosome                                |
|---------|----------------------|---------------------------------------------------------|
| SRY-1-6 | BV679100             | Distal Yp encompassing male-determining gene <i>SRY</i> |

**Table S5. Metaphase and interphase FISH assays of Y chromosome structure in individuals with breakpoints in the MSY**

**Table S5A. Metaphase FISH assays of Y chromosome structure**

See Table S5B for information on probes.

| Aim                                                                                                         | Assay                                                                          | Results   |
|-------------------------------------------------------------------------------------------------------------|--------------------------------------------------------------------------------|-----------|
| Detection of idicYp or isoYp chromosomes in individuals positive for sY14 and sY78, and negative for sY1273 | Visualization of chromosome structure by co-hybridization of pDP1335 and pDP97 | Figure 3  |
| Detection of idicYq in an individual positive for sY78 and sY1273, and negative for sY14                    | Visualization of chromosome structure by co-hybridization of 242E11 and pDP97  | Figure 5D |

**Table S5B. Probes used in metaphase FISH assays of Y chromosome structure**

See Figures 3 and 5D for probe hybridization sites.

| Probe   | Hybridization site in reference Y chromosome      | Source of DNA |
|---------|---------------------------------------------------|---------------|
| pDP1335 | <i>SRY</i> on distal Yp                           | Plasmid       |
| pDP97   | <i>DYZ3</i> elements in centromere                | Plasmid       |
| 242E13  | <i>DYZ1</i> elements in distal Yq heterochromatin | RPCI-11 BAC   |



**Table S5C. Interphase and metaphase FISH assays of copy number of specific sequences in isochromosomes, to more precisely determine the sites of recombination leading to isochromosome formation**

See Table S5D for information on probes.

| Targeted repeat | Assay                                                                                        | Results                 |
|-----------------|----------------------------------------------------------------------------------------------|-------------------------|
| P8              | Counting of 217J19 on interphase spreads                                                     | Figure S3A              |
| P6              | Counting of 15907/15908 on interphase spreads                                                | Figure S3B              |
| P5              | Counting of 15485/15486 on interphase spreads                                                | Figures 4B, 4C, and S3C |
| P4              | Counting of 16053/16054 on interphase spreads                                                | Figure S3D              |
| IR2             | Counting of 15469/15470 on interphase spreads                                                | Figures 4B, 4D, and S3E |
| P3              | Counting of 15469/15470 on interphase spreads                                                | Figure S3F              |
| P1              | Counting of 1325K3 on interphase spreads                                                     | Figure S4D              |
| P1              | Counting of 18E8 on interphase spreads                                                       | Figure S4E              |
| P1              | Counting of 100J21 on interphase spreads                                                     | Figure S4F              |
| DYZ3            | Counting of 15499/15500 in co-hybridization with pDP97 on interphase spreads                 | Figure S5A              |
| proximal DYZ17  | Counting of 15499/15500 in co-hybridization with pDP97 on interphase spreads                 | Figure S5B              |
| DYZ18/DYZ1/DYZ2 | Visualization of copy number of 1136L22 in co-hybridization with 242E13 on metaphase spreads | Figures 4B, 4E, and S5C |
| IR3             | Counting of 15499/15500 in co-hybridization with pDP97 on interphase spreads                 | Figures 5E and S7       |

**Table S5D. Probes used in interphase and metaphase FISH assays of copy number of specific sequences in isochromosomes, to more precisely determine the sites of recombination leading to isochromosome formation**

See Figures 4, 5E, S3, S4, S5, and S7 for probe hybridization sites.

| Probe       | Hybridization site in reference Y chromosome                                              | Source of DNA               |
|-------------|-------------------------------------------------------------------------------------------|-----------------------------|
| 217J19      | 1 Mb proximal to P8                                                                       | RPCI-11 BAC                 |
| 15907/15908 | 2.5 kb proximal to P6                                                                     | Long-range PCR <sup>c</sup> |
| 15485/15486 | 44 kb proximal to P5                                                                      | Long-range PCR <sup>c</sup> |
| 16053/16054 | 9.7 kb and 477 kb proximal to P4 <sup>a</sup>                                             | Long-range PCR <sup>c</sup> |
| 15469/15470 | 208 kb proximal to IR2, 581 kb proximal to P3                                             | Long-range PCR <sup>c</sup> |
| 1325K3      | <i>DYZ19</i> elements in Yq                                                               | RPCI-11 BAC                 |
| 18E8        | Red amplicons in P1 and P2                                                                | Cosmid                      |
| 100J21      | Yellow amplicons in P1                                                                    | RPCI-11 BAC                 |
| 15499/15500 | Proximal Yp between centromere and proximal arm of IR3 <sup>b</sup>                       | Long-range PCR <sup>c</sup> |
| pDP97       | <i>DYZ3</i> elements in centromere                                                        | Plasmid                     |
| 1136L22     | Spans proximal boundary between euchromatic Yq and <i>DYZ18/DYZ1/DYZ2</i> heterochromatin | RPCI-11 BAC                 |
| 242E13      | <i>DYZ1</i> elements <i>DYZ18/DYZ1/DYZ2</i> heterochromatin                               | RPCI-11 BAC                 |

<sup>a</sup> In the arms of palindrome P5, 9.7 kb from the end of each arm

<sup>b</sup> 280 kb from *DYZ3* elements in centromere, 28 kb proximal to IR3

<sup>c</sup> See Table S5E for primer sequences and amplification protocol for synthesis of FISH probes by long-range PCR

**Table S5E. Primers and amplification protocol for long-range PCR production of specific FISH probes**

| Left primer | Sequence                     | Right primer | Sequence                       | RPCI-11 BAC template | Product size (bp) |
|-------------|------------------------------|--------------|--------------------------------|----------------------|-------------------|
| 15907       | GTGTGCATCAGGATTCATGGAGACAGAA | 15908        | TGTTTGGTTAGACACACCCTTTGCAAATTC | 455E3                | 10,468            |
| 15485       | GCTACACCCTTTGTGGAGAATTCGGAC  | 15486        | AGAAGGCTAATCTTCAAGGGTGGTGCAG   | 537C24               | 10,582            |
| 16053       | ACACCACCTGAGGTCAGGACTTTGAGAC | 16054        | AGAAAATAGGATGTGTGCAGCCAACCAG   | 529I21               | 10,324            |
| 15469       | CTTTTCCTGCCATTGCTTTTGGTGTTTT | 15470        | CAAGGGAGCCTTGATCAGCACTTTTCTT   | 209I11               | 10,446            |
| 15499       | TTCCGCACATTCTCCTAGCAAATCTCA  | 15500        | GGCTGACAGAAGGGAGAAAATGAAAGGA   | 155J5                | 10,395            |

Long-range PCR was performed using Advantage 2 Taq polymerase (BD Biosciences) according to the manufacturer's instructions. Each primer was at 1  $\mu$ M final concentration. For a 100  $\mu$ l reaction, template DNA was either 20  $\mu$ l of a 1/10 dilution of an overnight BAC inoculant or 50 ng of extracted BAC DNA. Amplification conditions were 95°C for 1 minute; 30 cycles of 95°C for 30 seconds, 68°C for 10 minutes; 68°C for 10 minutes.

## Supplemental References

- Aronson, M.M., Nichols, W.W., Mulivor, R.A., Greene, A.E., and Coriell, L.L. (1983). Chromosome maps of cell lines with specific monosomic or trisomic portions of the genome in the NIGMS Human Genetic Mutant Cell Repository. *Cytogenet. Cell Genet.* **36**, 652-658.
- Cantrell, M.A., Bogan, J.S., Simpson, E., Bicknell, J.N., Goulmy, E., Chandler, P., Pagon, R.A., Walker, D.C., Thuline, H.C., Graham, J.M., Jr., et al. (1992). Deletion mapping of H-Y antigen to the long arm of the human Y chromosome. *Genomics* **13**, 1255-1260.
- Goulmy, E., van Leeuwen, A., Blokland, E., Sachs, E.S., and Geraedts, J.P. (1983). The recognition of abnormal sex chromosome constitution by HLA-restricted anti-H-Y cytotoxic T cells and antibody. *Immunogenetics* **17**, 523-531.
- Harrington, J.J., Van Bokkelen, G., Mays, R.W., Gustashaw, K., and Willard, H.F. (1997). Formation of de novo centromeres and construction of first-generation human artificial microchromosomes. *Nat. Genet.* **15**, 345-355.
- Kirsch, S., Weiss, B., Miner, T.L., Waterston, R.H., Clark, R.A., Eichler, E.E., Munch, C., Schempp, W., and Rappold, G. (2005). Interchromosomal segmental duplications of the pericentromeric region on the human Y chromosome. *Genome Res.* **15**, 195-204.
- Lahn, B.T., Ma, N., Breg, W.R., Stratton, R., Surti, U., and Page, D.C. (1994). Xq-Yq interchange resulting in supernormal X-linked gene expression in severely retarded males with 46,XYq- karyotype. *Nat. Genet.* **8**, 243-250.
- Lange, J., Skaletsky, H., Bell, G.W., and Page, D.C. (2008). MSY Breakpoint Mapper, a database of sequence-tagged sites useful in defining naturally occurring deletions in the human Y chromosome. *Nucleic Acids Res.* **36**, D809-814.
- Morton, N.E. (1991). Parameters of the human genome. *Proc. Natl. Acad. Sci. USA* **88**, 7474-7476.
- O'Reilly, A.J., Affara, N.A., Simpson, E., Chandler, P., Goulmy, E., and Ferguson-Smith, M.A. (1992). A molecular deletion map of the Y chromosome long arm defining X and autosomal homologous regions and the localisation of the HYA locus to the proximal region of the Yq euchromatin. *Hum. Mol. Genet.* **1**, 379-385.
- Reijo, R., Lee, T.Y., Salo, P., Alagappan, R., Brown, L.G., Rosenberg, M., Rozen, S., Jaffe, T., Straus, D., Hovatta, O., et al. (1995). Diverse spermatogenic defects in humans caused by Y chromosome deletions encompassing a novel RNA-binding protein gene. *Nat. Genet.* **10**, 383-393.
- Reijo, R., Alagappan, R.K., Patrizio, P., and Page, D.C. (1996). Severe oligozoospermia resulting from deletions of azoospermia factor gene on Y chromosome. *Lancet* **347**, 1290-1293.
- Repping, S., van Daalen, S.K., Brown, L.G., Korver, C.M., Lange, J., Marszalek, J.D., Pyntikova, T., van der Veen, F., Skaletsky, H., Page, D.C., et al. (2006). High mutation rates have driven extensive structural polymorphism among human Y chromosomes. *Nat. Genet.* **38**, 463-467.
- Silber, S.J., Alagappan, R., Brown, L.G., and Page, D.C. (1998). Y chromosome deletions in azoospermic and severely oligozoospermic men undergoing intracytoplasmic sperm injection after testicular sperm extraction. *Hum. Reprod.* **13**, 3332-3337.
- Skaletsky, H., Kuroda-Kawaguchi, T., Minx, P.J., Cordum, H.S., Hillier, L., Brown, L.G., Repping, S., Pyntikova, T., Ali, J., Bieri, T., et al. (2003). The male-specific region of the human Y chromosome is a mosaic of discrete sequence classes. *Nature* **423**, 825-837.
- Vollrath, D., Foote, S., Hilton, A., Brown, L.G., Beer-Romero, P., Bogan, J.S., and Page, D.C. (1992). The human Y chromosome: a 43-interval map based on naturally occurring deletions. *Science* **258**, 52-59.
